# Supplementary material for: Phosphorescent Cu(i) complexes based on bis(pyrazol-1-yl-methyl)-pyridine derivatives for organic light-emitting diodes
Source: Royal Society of Chemistry journal article supplement (doi:10.1039/c4tc01885k), 2014-10-23
Supplement: c4tc01885k1.pdf [file c4tc01885k1.pdf]

## **Supporting Information**

# **Phosphorescent Cu(I) Complexes based on Bis(pyrazol-1-yl-methyl)-pyridine Derivatives for Organic Light-Emitting Diodes**

Fengshou Wu, Hongbo Tong, Jie Li, Zaoying Li,\* Chihaya Adachi, Adam Langlois,

Pierre D. Harvey, Li Liu, Wai-Yeung Wong,\* Wai-Kwok Wong\* and Xunjin Zhu\*

## **1. Experimental Section**

### **1.1. Instrumentation and spectroscopic methods**

NMR spectra were recorded on a Bruker Ultrashield 400 Plus NMR spectrometer. The NMR chemical shifts for  $^1\text{H}$  and  $^{31}\text{P}$  were referenced to tetramethylsilane ( $\delta = 0.00$  ppm) and external 85%  $\text{H}_3\text{PO}_4$ . High-resolution mass spectra, reported as  $m/z$ , were obtained on a Bruker Autoflex MALDI-TOF mass spectrometer. The electronic absorption spectra in the UV/Vis region were recorded with a Hewlett Packard 8453 UV/Vis spectrophotometer. Luminescence properties of the complexes in degassed dichloromethane solution and in spin-coated poly (methyl methacrylate) (PMMA) films ( $\approx 20$  wt % of the complex) were investigated at ambient temperature. Steady-state visible fluorescence and PL-excitation spectra were measured with a Photon Technology International (PTI) Alphascan spectrofluorimeter. Visible-decay spectra were recorded with a pico- $\text{N}_2$  laser system (PTI Time Master) with  $\lambda_{\text{ex}} = 337$  nm. Photoluminescence quantum yields ( $\Phi_{\text{PL}}$  or PLQY) in solution were obtained from corrected spectra on a wavelength scale (nm) and measured according to the approach described by Demas and Crosby<sup>1</sup> using air-equilibrated  $[\text{Ru}(\text{bpy})_3][\text{Cl}]_2$  water solution ( $\Phi_{\text{PL}} = 0.028$ ) as the standard.<sup>2</sup> Solid-state  $\Phi_{\text{PL}}$  values were determined using a Hamamatsu system for absolute PL quantum yield measurements (type C9920-02)

---

equipped with an integrating sphere with Spectralon inner surface coating. The samples were carefully degassed by at least five freeze-pump-thaw cycles.

Thermogravimetric analysis (TGA) was performed on a Perkin-Elmer thermal analyzer. Cyclic voltammetry measurements were conducted on a CHI660C electrochemical workstation, using a polished Pt plate as the working electrode, Pt mesh as the counter electrode, and a saturated calomel electrode (SCE) as the reference electrode, at a scan rate of 0.1 V/s. Cyclic voltammograms were recorded using tetrabutylammonium hexafluorophosphate as the supporting electrolyte. Solutions were purged with N<sub>2</sub> for 10 min to remove dissolved O<sub>2</sub>.

## **1.2. DFT calculation procedure**

The density functional theory (DFT) and time dependent density functional theory (TD-DFT) calculations were performed with Gaussian 09<sup>3</sup> at the Université de Sherbrooke with the Mammouth supercomputer supported by Le Réseau Québécois De Calculs Hautes Performances. The DFT geometry optimisations as well as TD-DFT calculations<sup>4-12</sup> were carried out using the B3LYP method. A 6-31g\* basis set was used for C, H, N, P, and F atoms.<sup>13-18</sup> VDZ (valence double  $\zeta$ ) with SBKJC effective core potentials were used for all Cu and Br atoms.<sup>13-18</sup> Geometry optimisations and TDDFT calculations were carried out in the absence of solvent effects. In order to verify the nature of the stationary points that of both the singlet and triplet state geometry optimization calculations a frequency calculation was performed. The results of the frequency calculations showed no imaginary frequencies for all singlet and triplet optimized structures. The lack of imaginary frequencies indicates clearly that the optimised structures are a true minimum. Spin density distributions were also calculated for each of the examined compounds. The results of the spin density calculations support the notion of mixed MLCT (Cu(I) to bis(pyrazol-1-yl)-pyridine) and LLCT (phosphine to bis(pyrazol-1-yl)-pyridine) and are shown further in the supporting information. The calculated absorption spectra were obtained from GaussSum 2.1.<sup>19</sup>

## **1.3. Device fabrication and measurements**

PEDOT-PSS (CH8000) was purchased from H.C. Stark. PYD2 and DPEPO were synthesized using the following procedures described previously.<sup>20,21</sup> Before device fabrication, PYD2 and DPEPO were purified by sublimation after recrystallization from dichloromethane/methanol and dichloromethane/ether admixtures, respectively.

A 40 nm thick poly(3,4-ethylenedioxythiophene):poly(styrene sulfonic acid) (PEDOT:PSS) layer was spin-coated at 3000 rpm onto a pre-cleaned ITO glass substrate, followed by drying at 200 °C for 10 min. Subsequently, a 30 nm thick doped film of Cu(I) complex in PYD2 was spin-coated at 1500 rpm onto the PEDOT layer from a filtered 5.5 mg mL<sup>-1</sup> CH<sub>2</sub>Cl<sub>2</sub> solution. After the film was dried under a vacuum for 1 h at room temperature, a 50 nm thick electron-transport layer (DPEPO) was deposited in an inert chamber under a pressure of < 4 × 10<sup>-4</sup> Pa. Finally, the cathode was fabricated by thermal evaporation of a LiF layer (0.5 nm) followed by an Al layer (100 nm). The intersection of the ITO and the metal electrodes gives an active device area of 4 mm<sup>2</sup>. The current density, voltage, and brightness characteristics of the OLEDs were measured in ambient air with a semiconductor parameter analyzer (E5273A, Agilent) and an optical power meter (1930C, Newport). The EL spectra were recorded using a multi-channel spectrometer (UBS2000, Ocean Optics).

#### 1.4. Synthesis of ligands (L1–L5)

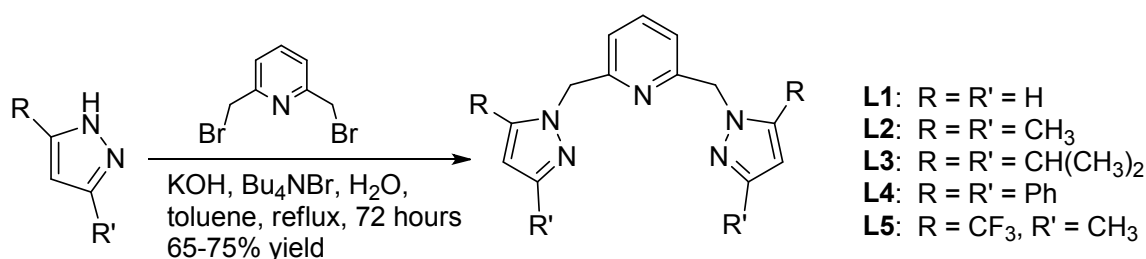

**Scheme S1** The synthetic routes for the Cu(I) complexes **P1–P5**.

In a 50 mL Schlenk flask equipped with a reflux condenser, pyrazole (20.5 mmol), potassium hydroxide (2.31 g, 41.2 mmol), tetrabutylammonium bromide (0.212 g, 0.63 mmol), and water (1 mL) were stirred at room temperature for 25 min. Then 2,6-

---

bis(bromomethyl)pyridine (2.55 g, 9.6 mmol) and toluene (25 mL) were added and the mixture was heated to reflux for 72 hours. The resulting mixture was treated with water and the combined organic layers were dried with magnesium sulphate, concentrated, and purified by column chromatography on silica gel (hexane-dichloromethane as eluent) to afford the desired white solid.

2,6-Bis(pyrazol-1-ylmethyl)-pyridine (**L1**). (Yield 75%). <sup>1</sup>H NMR (400 MHz, CDCl<sub>3</sub>): δ/ppm 5.45 (s, 4H, CH<sub>2</sub>), 6.33 (t, 2H, *J*(HH) = 2.2 Hz, H4-pz), 6.83 (d, 2H, *J*(HH) = 8.0 Hz, H3-pz), 7.52 (d, 2H, *J*(HH) = 2.0 Hz, H5-pz) and 7.54-7.57 (m, 3H, H-py). MALDI-TOF MS: [M]<sup>+</sup> Calcd for [C<sub>13</sub>H<sub>13</sub>N<sub>5</sub>]<sup>+</sup>, 239.1136, Found: 239.3415.

2,6-Bis(3,5-dimethylpyrazol-1-ylmethyl)-pyridine (**L2**). (Yield 75%). <sup>1</sup>H NMR (400 MHz, CDCl<sub>3</sub>): δ/ppm 2.17 (s, 6H, Me5-pz), 2.25 (s, 6H, Me3-pz), 5.30 (s, 4H, CH<sub>2</sub>), 5.87 (s, 2H, H4-pz), 6.61 (d, 2H, *J*(HH) = 8.0 Hz, H3-py) and 7.50 (t, 1H, *J*(HH) = 8.0 Hz, H4-py). MALDI-TOF MS: [M]<sup>+</sup> Calcd for [C<sub>17</sub>H<sub>21</sub>N<sub>5</sub>]<sup>+</sup>, 295.1827, Found: 295.5741.

2,6-Bis(3,5-diisopropylpyrazol-1-ylmethyl)-pyridine (**L3**). (Yield 65%). <sup>1</sup>H NMR (400 MHz, CDCl<sub>3</sub>): δ/ppm 1.14 (d, 12H, *J*(HH) = 6.8 Hz, Me5-pz), 1.28 (d, 12H, *J*(HH) = 6.8 Hz, Me3-pz), 2.84 (m, 2H, CH-5-pz), 2.98-3.02 (m, 2H, CH-3-pz), 5.38 (s, 4H, CH<sub>2</sub>), 5.93 (s, 2H, H4-pz), 6.50 (d, 2H, *J*(HH) = 8.0 Hz, H3-py) and 7.48 (t, 1H, *J*(HH) = 8.0 Hz, H4-py). MALDI-TOF MS: [M]<sup>+</sup> Calcd for [C<sub>25</sub>H<sub>37</sub>N<sub>5</sub>]<sup>+</sup>, 407.3121, Found: 407.3123.

2,6-Bis(3,5-diphenylpyrazol-1-ylmethyl)-pyridine (**L4**). (Yield 70%). <sup>1</sup>H NMR (400 MHz, CDCl<sub>3</sub>): δ/ppm 5.47 (s, 4H, CH<sub>2</sub>), 6.68 (s, 2H, H4-pz), 6.88 (d, 2H, *J*(HH) = 8.0 Hz, H3-pz), 7.34-7.37 (m, 16H, *o,m*-Ph), 7.57 (t, 1H, *J*(HH) = 8.0 Hz, H4-py), 7.83-7.86 (m, 4H, *p*-Ph). MALDI-TOF MS: [M]<sup>+</sup> Calcd for [C<sub>37</sub>H<sub>29</sub>N<sub>5</sub>]<sup>+</sup>, 543.2495, Found: 543.2512.

2,6-Bis(3-methyl-5-trifluoromethylpyrazol-1-ylmethyl)-pyridine (**L5**). (Yield 65%). <sup>1</sup>H NMR (400 MHz, CDCl<sub>3</sub>): δ/ppm 2.18 (s, 6H, Me3-pz), 5.38 (s, 4H, CH<sub>2</sub>), 6.31 (s, 2H, H4-pz), 6.92 (d, 2H, *J*(HH) = 8.0 Hz, H3-py), 7.63 (t, 1H, *J*(HH) = 8.0 Hz, H4-py). MALDI-TOF MS: [M]<sup>+</sup>: Calcd for [C<sub>17</sub>H<sub>15</sub>F<sub>6</sub>N<sub>5</sub>]<sup>+</sup>, 403.1253, Found: 403.2362.

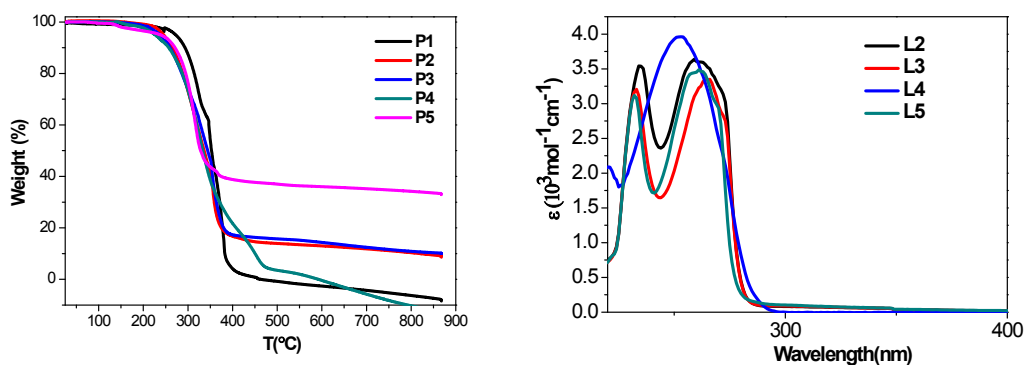

**Fig. S1** Left: TGA traces of complexes **P1–P5**; Right: Absorption spectra of the ligands in  $\text{CH}_2\text{Cl}_2$ .

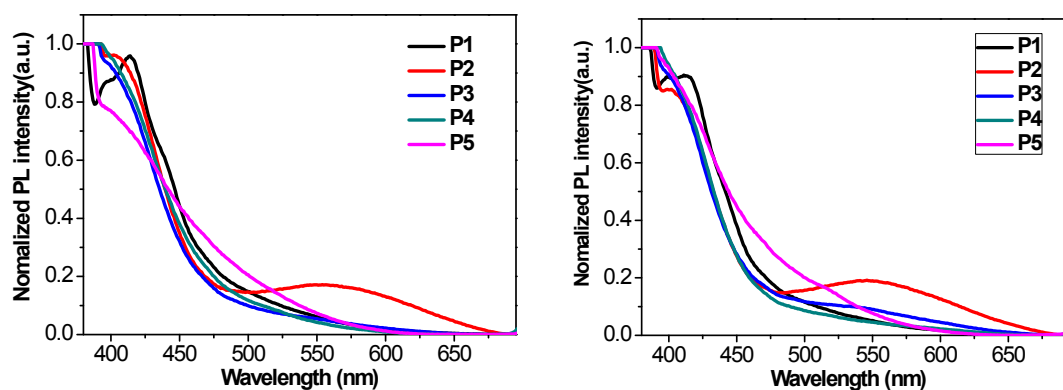

**Fig. S2** Left: Emission spectra of the Cu (I) complexes in  $\text{CH}_3\text{CN}$ ; Right: Emission spectra of the Cu (I) complexes in MeOH.

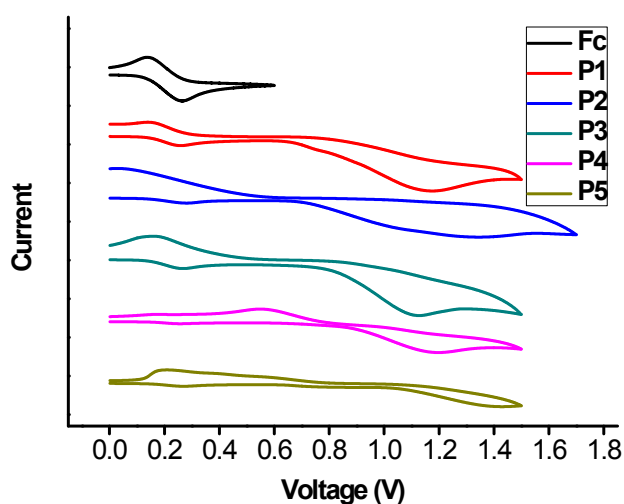

**Fig. S3** Cyclic voltammograms of the Cu(I) complexes and the reference.

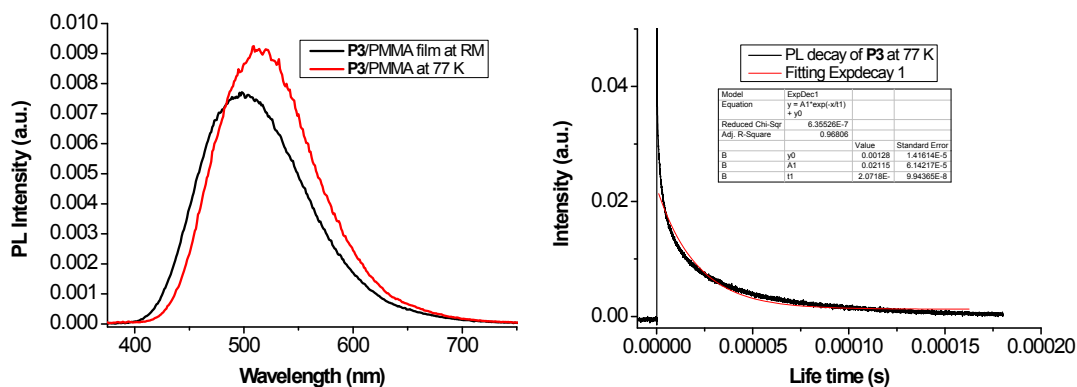

**Fig. S4.** (a) PL of P3 at 77 K and room temperature; (b) PL decay of P3 at 77 K.

## 2. DFT and TDDFT calculation results

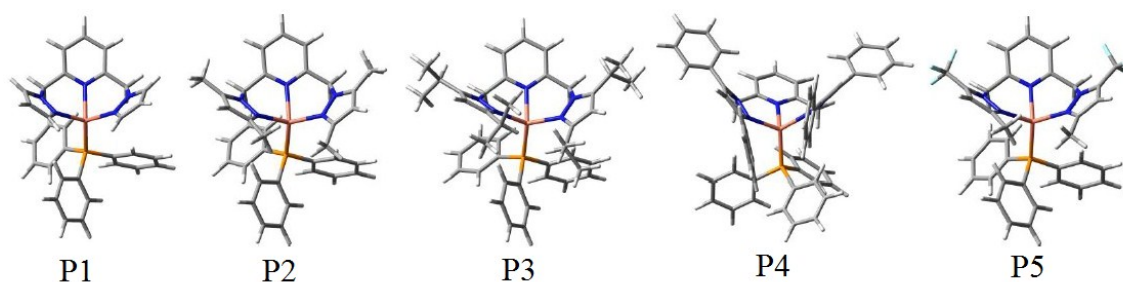

**Fig. S5** Optimized geometries of compounds **P1** to **P5** obtained by DFT using the G09/B3LYP method.

### 2.1 DFT calculation results for P1

Images of the molecular orbitals of complex **P1** (including the orbital energies), a table describing the molecular orbital contributions function of molecular fragments, a side view image of the spin density distribution for **P1** showing the mixed MLCT and LLCT, a graphical representation of the calculated UV-Visible absorption spectrum and a table comparing the molecular geometry about the copper atom of **P1** in the  $S_0$  and  $t_1$  states are provided in the main text of this work. A detailed conformational analysis comparing the bond length, bond angles and dihedral angles is provided here. The table below provided the 100 calculated transitions for compound **P1**.

**Table S1** Calculated positions of the 100 first electronic transitions, oscillator strength (F) and major contributions to these electronic transitions for **P1**.

| Wavelength<br>(nm) | Osc.<br>Strength | Major contributors (%) |
|--------------------|------------------|------------------------|
|--------------------|------------------|------------------------|

|       |        |                                                                               |
|-------|--------|-------------------------------------------------------------------------------|
| 391.5 | 0.0368 | HOMO→LUMO (97%)                                                               |
| 371.0 | 0.0045 | H-1→LUMO (97%)                                                                |
| 356.6 | 0.0024 | H-2→LUMO (99%)                                                                |
| 333.9 | 0.0055 | HOMO→L+1 (98%)                                                                |
| 312.4 | 0.0001 | H-1→L+1 (98%)                                                                 |
| 308.0 | 0.0003 | H-6→LUMO (96%)                                                                |
| 302.9 | 0.0091 | H-9→LUMO (10%), H-7→LUMO (39%), H-5→LUMO (27%), H-4→LUMO (13%)                |
| 299.6 | 0.0004 | H-2→L+1 (97%)                                                                 |
| 284.9 | 0.0079 | H-9→LUMO (10%), H-7→LUMO (14%), H-4→LUMO (39%), H-3→LUMO (23%)                |
| 282.7 | 0.0007 | H-4→LUMO (11%), H-3→LUMO (73%)                                                |
| 282.2 | 0.0082 | H-5→LUMO (50%), H-4→LUMO (20%), HOMO→L+2 (20%)                                |
| 281.7 | 0.0481 | HOMO→L+2 (59%), HOMO→L+3 (22%)                                                |
| 280.7 | 0.075  | HOMO→L+2 (17%), HOMO→L+3 (73%)                                                |
| 272.4 | 0.0019 | H-8→LUMO (86%)                                                                |
| 270.4 | 0.0536 | HOMO→L+4 (87%)                                                                |
| 269.0 | 0.0125 | H-10→LUMO (17%), H-9→LUMO (49%), H-7→LUMO (27%)                               |
| 266.3 | 0.0002 | H-10→LUMO (72%), H-9→LUMO (22%)                                               |
| 263.6 | 0.0006 | H-6→L+1 (95%)                                                                 |
| 263.1 | 0.0078 | H-7→L+1 (15%), H-5→L+1 (12%), HOMO→L+5 (15%), HOMO→L+6 (33%)                  |
| 262.6 | 0.0026 | H-11→LUMO (12%), H-7→L+1 (22%), H-5→L+1 (14%), HOMO→L+5 (11%), HOMO→L+6 (19%) |
| 260.9 | 0.0056 | H-11→LUMO (71%), HOMO→L+5 (15%)                                               |
| 260.5 | 0.0085 | H-11→LUMO (12%), HOMO→L+5 (36%), HOMO→L+6 (35%)                               |
| 259.2 | 0.0027 | H-12→LUMO (94%)                                                               |
| 258.5 | 0.0026 | H-1→L+3 (73%)                                                                 |
| 257.3 | 0.0288 | H-1→L+2 (81%)                                                                 |
| 255.4 | 0.0051 | H-2→L+2 (83%)                                                                 |
| 253.9 | 0.0141 | H-1→L+4 (63%), H-1→L+5 (17%)                                                  |
| 252.8 | 0.0012 | H-7→L+1 (13%), H-4→L+1 (32%), H-3→L+1 (30%)                                   |
| 251.3 | 0.014  | H-2→L+3 (21%), H-2→L+4 (31%), H-2→L+5 (11%), HOMO→L+7 (16%)                   |
| 251.1 | 0.0015 | H-4→L+1 (11%), H-3→L+1 (64%)                                                  |
| 250.7 | 0.0052 | H-5→L+1 (47%), H-4→L+1 (21%)                                                  |
| 250.4 | 0.0036 | H-4→L+1 (13%), H-2→L+3 (10%), H-2→L+4 (19%), HOMO→L+7 (30%)                   |
| 248.0 | 0.0393 | H-2→L+3 (40%), HOMO→L+7 (31%)                                                 |
| 246.1 | 0.0012 | H-1→L+5 (11%), H-1→L+6 (73%)                                                  |
| 245.0 | 0.013  | H-13→LUMO (84%)                                                               |
| 244.1 | 0.0036 | HOMO→L+8 (43%), HOMO→L+9 (14%)                                                |
| 243.5 | 0.002  | HOMO→L+8 (18%), HOMO→L+9 (47%)                                                |
| 243.0 | 0.001  | H-8→L+1 (83%)                                                                 |
| 240.4 | 0.0033 | H-2→L+6 (65%)                                                                 |
| 240.4 | 0.0005 | H-10→L+1 (17%), H-9→L+1 (48%), H-7→L+1 (29%)                                  |

|       |        |                                                             |
|-------|--------|-------------------------------------------------------------|
| 239.2 | 0.0006 | H-1→L+4 (20%), H-1→L+5 (54%), H-1→L+6 (10%)                 |
| 238.0 | 0.002  | H-10→L+1 (71%), H-9→L+1 (23%)                               |
| 236.4 | 0.0065 | H-14→LUMO (90%)                                             |
| 236.3 | 0.0036 | H-2→L+4 (23%), H-2→L+5 (50%)                                |
| 233.4 | 0.0019 | H-12→L+1 (57%), H-3→L+2 (12%)                               |
| 233.3 | 0.0031 | H-12→L+1 (31%), H-3→L+2 (22%)                               |
| 233.1 | 0.0222 | H-11→L+1 (95%)                                              |
| 231.2 | 0.0085 | H-5→L+3 (18%), H-4→L+2 (18%)                                |
| 229.5 | 0.0008 | H-5→L+3 (13%), H-3→L+3 (11%), H-1→L+7 (11%), HOMO→L+8 (11%) |
| 228.9 | 0.003  | H-1→L+7 (57%)                                               |
| 228.4 | 0.0249 | H-15→LUMO (20%), H-6→L+2 (25%)                              |
| 228.0 | 0.0227 | H-15→LUMO (33%), H-6→L+2 (39%)                              |
| 227.3 | 0.0071 | H-6→L+2 (18%), H-6→L+3 (24%)                                |
| 227.2 | 0.0045 | H-7→L+2 (10%), H-5→L+2 (17%), H-4→L+2 (11%), H-4→L+3 (12%)  |
| 226.5 | 0.0074 | H-6→L+3 (15%), H-5→L+2 (15%), H-3→L+2 (11%), H-3→L+3 (18%)  |
| 226.3 | 0.0057 | H-6→L+3 (20%), H-3→L+3 (25%), H-2→L+7 (17%)                 |
| 225.7 | 0.0028 | H-4→L+3 (12%), H-2→L+7 (38%)                                |
| 224.7 | 0.0137 | H-7→L+3 (17%), H-4→L+3 (29%), H-3→L+2 (14%)                 |
| 224.1 | 0.0132 | H-7→L+2 (35%), H-5→L+2 (12%), H-4→L+2 (12%)                 |
| 223.6 | 0.0145 | H-6→L+4 (42%), H-6→L+5 (11%)                                |
| 222.7 | 0.0218 | H-7→L+4 (25%), H-5→L+4 (11%)                                |
| 222.2 | 0.007  | H-8→L+3 (16%), H-7→L+3 (24%), H-5→L+3 (21%)                 |
| 221.0 | 0.0071 | H-1→L+8 (43%), H-1→L+9 (15%)                                |
| 220.6 | 0.0017 | H-13→L+1 (92%)                                              |
| 220.3 | 0.0015 | H-8→L+2 (17%), H-1→L+8 (33%), H-1→L+9 (25%)                 |
| 220.1 | 0.0126 | H-8→L+2 (23%), H-5→L+2 (11%), H-2→L+9 (12%), H-1→L+9 (10%)  |
| 219.8 | 0.0044 | H-2→L+9 (53%), H-1→L+8 (13%)                                |
| 218.7 | 0.0044 | H-10→L+2 (21%), H-9→L+2 (31%), H-8→L+2 (10%)                |
| 217.7 | 0.0021 | H-9→L+3 (24%), H-8→L+3 (18%), H-3→L+4 (27%)                 |
| 217.4 | 0.0152 | H-6→L+6 (14%), H-2→L+8 (57%), H-2→L+9 (10%)                 |
| 216.6 | 0.0133 | H-7→L+6 (20%), H-6→L+6 (22%)                                |
| 216.5 | 0.0314 | HOMO→L+10 (49%)                                             |
| 216.0 | 0.0014 | H-6→L+6 (22%)                                               |
| 215.0 | 0.0347 | H-9→L+3 (19%), H-4→L+4 (26%), H-3→L+4 (15%)                 |
| 214.5 | 0.0287 | H-10→L+2 (13%), H-10→L+3 (23%), H-4→L+4 (13%)               |
| 213.7 | 0.038  | H-10→L+2 (25%), H-4→L+4 (22%)                               |
| 213.2 | 0.0012 | H-14→L+1 (89%)                                              |
| 212.4 | 0.0039 | H-6→L+4 (21%), H-6→L+5 (50%), H-6→L+6 (10%), H-6→L+7 (11%)  |
| 212.2 | 0.0489 | H-10→L+3 (15%), H-5→L+4 (12%)                               |
| 211.5 | 0.0052 | H-10→L+3 (10%), H-7→L+4 (12%), H-7→L+5 (18%)                |
| 210.4 | 0.03   | H-5→L+4 (14%), H-3→L+7 (15%)                                |
| 209.7 | 0.0086 | H-4→L+7 (10%), H-3→L+5 (19%)                                |
| 209.2 | 0.0047 | H-20→LUMO (15%), H-16→LUMO (53%)                            |



|       |        |                                                            |
|-------|--------|------------------------------------------------------------|
| 208.6 | 0.0157 | H-3→L+5 (34%), H-3→L+7 (19%)                               |
| 208.4 | 0.0074 | H-4→L+5 (24%), H-4→L+6 (13%), H-3→L+6 (35%)                |
| 208.2 | 0.0046 | H-8→L+4 (22%), H-5→L+7 (12%), H-4→L+7 (12%)                |
| 207.4 | 0.0022 | H-7→L+5 (13%), H-5→L+5 (32%), H-3→L+6 (12%)                |
| 206.8 | 0.0054 | H-4→L+6 (33%), H-3→L+5 (10%)                               |
| 206.4 | 0.0074 | H-4→L+5 (28%), H-3→L+6 (41%)                               |
| 206.1 | 0.0212 | H-9→L+4 (28%)                                              |
| 204.6 | 0.0131 | H-10→L+4 (22%), H-9→L+4 (10%), H-4→L+7 (16%)               |
| 204.2 | 0.0027 | H-6→L+7 (64%)                                              |
| 203.9 | 0.0089 | H-8→L+5 (11%), H-5→L+6 (41%)                               |
| 203.4 | 0.0182 | H-7→L+7 (13%), H-5→L+7 (10%)                               |
| 203.1 | 0.021  | H-2→L+10 (12%), H-1→L+10 (36%)                             |
| 202.9 | 0.0127 | H-2→L+10 (60%)                                             |
| 202.1 | 0.0387 | H-10→L+4 (18%), H-1→L+10 (12%)                             |
| 201.7 | 0.0024 | H-8→L+5 (19%), H-7→L+7 (21%)                               |
| 201.2 | 0.02   | H-9→L+5 (16%), H-8→L+5 (10%), HOMO→L+13 (10%)              |
| 200.7 | 0.0007 | H-9→L+5 (25%), H-8→L+5 (10%), H-7→L+7 (15%), H-3→L+9 (12%) |

**Table S2** Conformational analysis comparing the optimized structures of the singlet and triplet states of **P1**.

| Atom ID |        | Singlet State |    |    | Triplet State |        |        | Conformation change |        |        |                  |                   |                      |
|---------|--------|---------------|----|----|---------------|--------|--------|---------------------|--------|--------|------------------|-------------------|----------------------|
| Tag     | Symbol | NA            | NB | NC | X             | Y      | Z      | X                   | Y      | Z      | $\Delta$<br>Bond | $\Delta$<br>Angle | $\Delta$<br>Dihedral |
| 1       | C      |               |    |    | -2.946        | -1.146 | -1.297 | 2.478               | -1.155 | 1.491  |                  |                   |                      |
| 2       | C      | 1             |    |    | -4.147        | -1.182 | -2.008 | 3.454               | -1.132 | 2.461  | -0.02            |                   |                      |
| 3       | C      | 2             | 1  |    | -4.756        | 0.021  | -2.361 | 3.895               | 0.085  | 3.027  | 0.02             | 2.31              |                      |
| 4       | C      | 3             | 2  | 1  | -4.156        | 1.220  | -1.978 | 3.345               | 1.277  | 2.503  | 0.02             | -1.76             | 4.30                 |
| 5       | C      | 4             | 3  | 2  | -2.954        | 1.175  | -1.269 | 2.369               | 1.246  | 1.534  | -0.02            | 2.33              | -4.37                |
| 6       | N      | 5             | 4  | 3  | -2.357        | 0.013  | -0.952 | 1.864               | 0.029  | 1.056  | 0.06             | -0.97             | -1.89                |
| 7       | H      | 3             | 2  | 1  | -5.688        | 0.025  | -2.918 | 4.649               | 0.106  | 3.803  | 0.00             | 0.87              | -358.50              |
| 8       | H      | 2             | 1  | 6  | -4.594        | -2.133 | -2.279 | 3.889               | -2.075 | 2.783  | 0.00             | -1.76             | -358.23              |
| 9       | H      | 4             | 3  | 2  | -4.610        | 2.174  | -2.226 | 3.692               | 2.243  | 2.859  | 0.00             | -0.58             | 355.58               |
| 10      | C      | 1             | 6  | 5  | -2.232        | -2.412 | -0.860 | 2.007               | -2.426 | 0.853  | -0.02            | 6.52              | -0.95                |
| 11      | H      | 10            | 1  | 6  | -1.187        | -2.381 | -1.188 | 0.917               | -2.539 | 0.932  | 0.00             | 1.84              | -73.07               |
| 12      | H      | 10            | 1  | 6  | -2.705        | -3.293 | -1.297 | 2.473               | -3.290 | 1.330  | 0.00             | -0.14             | 167.07               |
| 13      | C      | 5             | 4  | 3  | -2.250        | 2.435  | -0.801 | 1.779               | 2.494  | 0.950  | -0.02            | 0.34              | 358.52               |
| 14      | H      | 13            | 5  | 4  | -2.730        | 3.323  | -1.217 | 2.174               | 3.375  | 1.459  | 0.00             | -0.36             | 12.73                |
| 15      | H      | 13            | 5  | 4  | -1.204        | 2.423  | -1.127 | 0.685               | 2.512  | 1.039  | 0.00             | 1.89              | 252.89               |
| 16      | N      | 13            | 5  | 4  | -2.268        | 2.576  | 0.653  | 2.080               | 2.673  | -0.488 | 0.02             | 1.11              | -226.42              |
| 17      | C      | 16            | 13 | 5  | -2.920        | 3.501  | 1.403  | 2.852               | 3.608  | -1.084 | -0.01            | 0.51              | 224.80               |
| 18      | C      | 16            | 13 | 5  | -1.806        | 2.097  | 2.691  | 2.071               | 2.196  | -2.590 | 0.01             | -0.24             | -127.97              |
| 19      | C      | 17            | 16 | 13 | -2.643        | 3.225  | 2.730  | 2.867               | 3.339  | -2.446 | 0.01             | 0.44              | -357.49              |
| 20      | H      | 17            | 16 | 13 | -3.513        | 4.279  | 0.943  | 3.326               | 4.389  | -0.507 | 0.00             | -0.22             | 3.44                 |

|    |    |    |    |    |        |        |        |        |        |        |       |        |         |
|----|----|----|----|----|--------|--------|--------|--------|--------|--------|-------|--------|---------|
| 21 | H  | 18 | 16 | 13 | -1.353 | 1.556  | 3.510  | 1.819  | 1.649  | -3.488 | 0.00  | -0.01  | -6.76   |
| 22 | H  | 19 | 17 | 16 | -2.990 | 3.766  | 3.597  | 3.379  | 3.894  | -3.217 | 0.00  | 0.00   | -358.80 |
| 23 | N  | 10 | 1  | 6  | -2.253 | -2.587 | 0.591  | 2.336  | -2.511 | -0.586 | 0.02  | 0.86   | 46.19   |
| 24 | C  | 23 | 10 | 1  | -2.915 | -3.525 | 1.316  | 3.198  | -3.337 | -1.217 | -0.01 | 0.88   | -223.49 |
| 25 | C  | 24 | 23 | 10 | -2.661 | -3.269 | 2.651  | 3.214  | -2.986 | -2.561 | 0.01  | 0.41   | 355.14  |
| 26 | H  | 24 | 23 | 10 | -3.498 | -4.296 | 0.834  | 3.728  | -4.108 | -0.676 | 0.00  | -0.18  | -5.85   |
| 27 | C  | 25 | 24 | 23 | -1.828 | -2.137 | 2.643  | 2.325  | -1.910 | -2.657 | -0.01 | 0.07   | -0.82   |
| 28 | H  | 25 | 24 | 23 | -3.020 | -3.824 | 3.504  | 3.787  | -3.447 | -3.351 | 0.00  | -0.02  | 358.66  |
| 29 | H  | 27 | 25 | 24 | -1.392 | -1.605 | 3.478  | 2.042  | -1.332 | -3.526 | 0.00  | 0.16   | -0.02   |
| 30 | N  | 27 | 25 | 24 | -1.582 | -1.725 | 1.394  | 1.789  | -1.626 | -1.457 | 0.01  | -0.46  | 0.69    |
| 31 | N  | 18 | 16 | 13 | -1.581 | 1.704  | 1.433  | 1.591  | 1.795  | -1.400 | 0.01  | -0.29  | -5.62   |
| 32 | Cu | 31 | 18 | 16 | -0.703 | 0.001  | 0.535  | 0.847  | 0.011  | -0.588 | -0.18 | -15.69 | 334.14  |
| 33 | P  | 32 | 31 | 18 | 1.475  | 0.008  | -0.091 | -1.421 | -0.046 | 0.070  | 0.10  | -15.33 | 195.19  |
| 34 | C  | 33 | 32 | 31 | 2.092  | 1.631  | -0.713 | -2.112 | 1.588  | 0.523  | -0.01 | -0.43  | -46.72  |
| 35 | C  | 34 | 33 | 32 | 2.975  | 1.747  | -1.797 | -2.947 | 1.758  | 1.638  | 0.00  | -0.98  | 278.62  |
| 36 | C  | 34 | 33 | 32 | 1.662  | 2.797  | -0.055 | -1.801 | 2.699  | -0.283 | 0.00  | 0.60   | -82.64  |
| 37 | C  | 35 | 34 | 33 | 3.419  | 3.004  | -2.213 | -3.466 | 3.019  | 1.938  | 0.00  | -0.25  | 358.46  |
| 38 | H  | 35 | 34 | 33 | 3.317  | 0.859  | -2.320 | -3.194 | 0.912  | 2.271  | 0.00  | 0.10   | -1.58   |
| 39 | C  | 36 | 34 | 33 | 2.115  | 4.050  | -0.468 | -2.330 | 3.954  | 0.018  | 0.00  | -0.28  | -357.70 |
| 40 | H  | 36 | 34 | 33 | 0.979  | 2.720  | 0.787  | -1.152 | 2.583  | -1.147 | 0.00  | 0.48   | 1.46    |
| 41 | C  | 37 | 35 | 34 | 2.992  | 4.156  | -1.550 | -3.161 | 4.116  | 1.130  | 0.00  | 0.00   | -0.41   |
| 42 | H  | 37 | 35 | 34 | 4.101  | 3.081  | -3.055 | -4.112 | 3.141  | 2.802  | 0.00  | -0.05  | -0.08   |
| 43 | H  | 39 | 36 | 34 | 1.783  | 4.943  | 0.054  | -2.091 | 4.805  | -0.614 | 0.00  | -0.05  | 358.98  |
| 44 | H  | 41 | 37 | 35 | 3.341  | 5.132  | -1.875 | -3.569 | 5.095  | 1.365  | 0.00  | -0.05  | -359.75 |
| 45 | C  | 33 | 32 | 31 | 1.854  | -1.172 | -1.460 | -1.816 | -1.185 | 1.446  | -0.02 | 2.01   | 197.22  |
| 46 | C  | 45 | 33 | 32 | 2.927  | -2.072 | -1.414 | -2.918 | -2.053 | 1.389  | 0.00  | -1.28  | 264.98  |
| 47 | C  | 45 | 33 | 32 | 1.015  | -1.171 | -2.589 | -1.010 | -1.160 | 2.598  | 0.00  | 0.55   | -95.87  |
| 48 | C  | 46 | 45 | 33 | 3.156  | -2.953 | -2.475 | -3.208 | -2.884 | 2.473  | 0.00  | -0.38  | -0.93   |
| 49 | H  | 46 | 45 | 33 | 3.586  | -2.089 | -0.552 | -3.548 | -2.082 | 0.506  | 0.00  | 0.26   | -0.88   |
| 50 | C  | 47 | 45 | 33 | 1.253  | -2.044 | -3.651 | -1.310 | -1.989 | 3.679  | 0.00  | -0.62  | 1.72    |
| 51 | H  | 47 | 45 | 33 | 0.180  | -0.476 | -2.641 | -0.148 | -0.500 | 2.646  | 0.00  | 0.31   | 1.41    |
| 52 | C  | 48 | 46 | 45 | 2.323  | -2.940 | -3.594 | -2.407 | -2.853 | 3.617  | 0.00  | -0.11  | -0.48   |
| 53 | H  | 48 | 46 | 45 | 3.991  | -3.647 | -2.425 | -4.062 | -3.553 | 2.422  | 0.00  | 0.04   | 359.89  |
| 54 | H  | 50 | 47 | 45 | 0.604  | -2.024 | -4.523 | -0.685 | -1.963 | 4.566  | 0.00  | -0.23  | 359.10  |
| 55 | H  | 52 | 48 | 46 | 2.506  | -3.624 | -4.418 | -2.637 | -3.501 | 4.458  | 0.00  | -0.17  | -359.76 |
| 56 | C  | 33 | 32 | 31 | 2.644  | -0.447 | 1.257  | -2.366 | -0.625 | -1.390 | -0.01 | -7.71  | 75.57   |
| 57 | C  | 56 | 33 | 32 | 3.927  | 0.111  | 1.367  | -3.504 | 0.047  | -1.866 | 0.00  | -0.14  | 276.17  |
| 58 | C  | 56 | 33 | 32 | 2.230  | -1.399 | 2.203  | -1.919 | -1.782 | -2.056 | 0.00  | -0.09  | -83.80  |
| 59 | C  | 57 | 56 | 33 | 4.779  | -0.280 | 2.401  | -4.185 | -0.439 | -2.983 | 0.00  | -0.23  | -0.65   |
| 60 | H  | 57 | 56 | 33 | 4.261  | 0.855  | 0.650  | -3.862 | 0.941  | -1.366 | 0.00  | 0.14   | -0.62   |
| 61 | C  | 58 | 56 | 33 | 3.087  | -1.795 | 3.231  | -2.607 | -2.264 | -3.168 | 0.00  | -0.18  | -358.69 |
| 62 | H  | 58 | 56 | 33 | 1.236  | -1.833 | 2.133  | -1.038 | -2.311 | -1.701 | 0.00  | 0.44   | 0.63    |
| 63 | C  | 59 | 57 | 56 | 4.362  | -1.234 | 3.332  | -3.740 | -1.592 | -3.634 | 0.00  | 0.08   | -0.08   |

---

|    |   |    |    |    |       |        |       |        |        |        |      |       |        |
|----|---|----|----|----|-------|--------|-------|--------|--------|--------|------|-------|--------|
| 64 | H | 59 | 57 | 56 | 5.769 | 0.161  | 2.478 | -5.068 | 0.083  | -3.342 | 0.00 | -0.08 | 0.14   |
| 65 | H | 61 | 58 | 56 | 2.758 | -2.535 | 3.954 | -2.258 | -3.161 | -3.671 | 0.00 | -0.08 | 359.29 |
| 66 | H | 63 | 59 | 57 | 5.027 | -1.536 | 4.136 | -4.274 | -1.965 | -4.503 | 0.00 | -0.04 | 359.97 |

---

## 2.2. DFT calculation results for P2

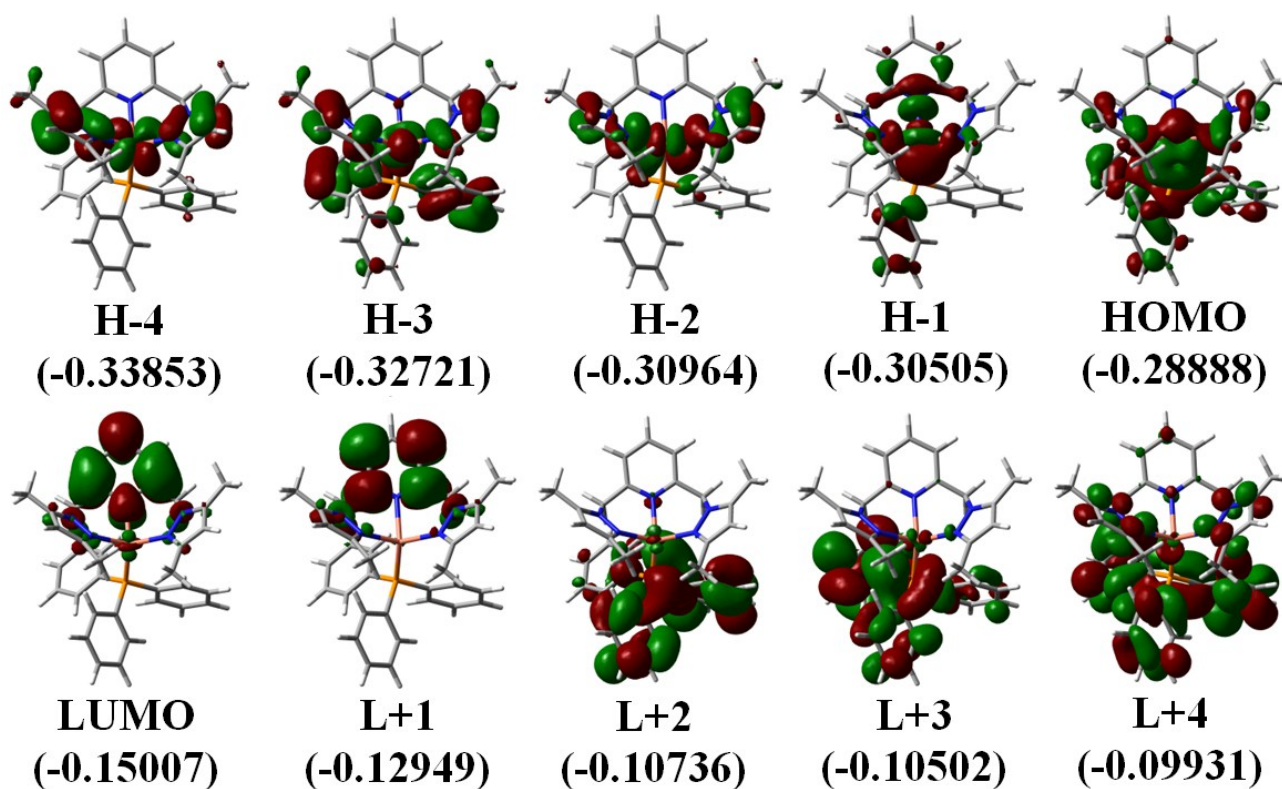

**Fig. S6** Representations of the frontier MOs for **P2**. The MO energies are in a.u..

**Table S3** Relative atomic contributions (in %) of the frontier MOs of compound **P2** separated by fragments. The grey boxes indicate the major contributions. (H = HOMO, L = LUMO)

| Molecular Fragment | H-4          | H-3          | H-2          | H-1          | HOMO         | LUMO         | L+1          | L+2          | L+3          | L+4          |
|--------------------|--------------|--------------|--------------|--------------|--------------|--------------|--------------|--------------|--------------|--------------|
| Pyridine           | 1.01         | 1.46         | 0.41         | 17.96        | 1.24         | <b>84.38</b> | <b>86.63</b> | 1.77         | 1.71         | 5.50         |
| Pyrazole groups    | 20.11        | 17.32        | 25.23        | 7.33         | 13.10        | 10.18        | 11.43        | 1.02         | 1.36         | 10.76        |
| Copper             | <b>75.11</b> | <b>50.81</b> | <b>69.19</b> | <b>68.24</b> | <b>44.02</b> | 2.02         | 0.71         | 1.65         | 1.74         | 7.62         |
| Triphenylphosphine | 1.71         | 28.72        | 3.58         | 6.00         | <b>40.85</b> | 1.78         | 0.83         | <b>94.39</b> | <b>94.49</b> | <b>72.12</b> |
| Methyl groups      | 1.47         | 1.69         | 1.60         | 0.47         | 0.79         | 1.65         | 0.41         | 1.17         | 0.71         | 4.01         |

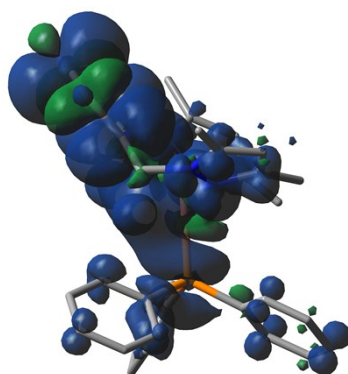

**Fig. S7** Side view image of the spin density distribution for **P2** showing the mixed MLCT and LLCT

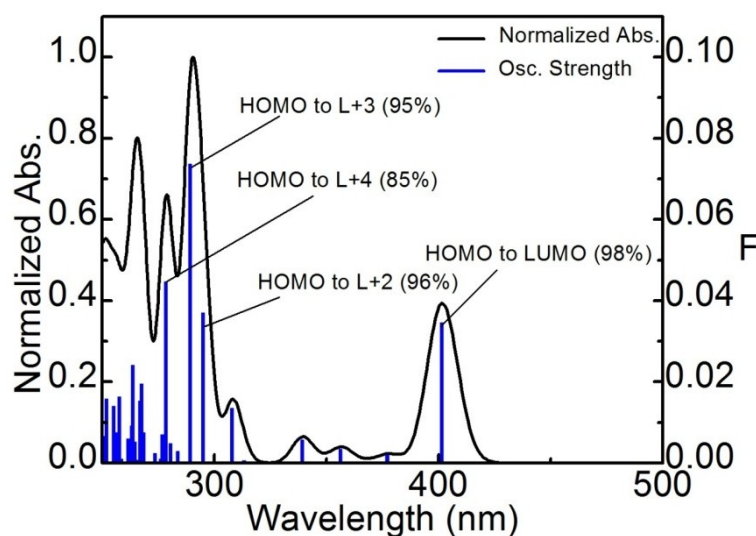

**Fig. S8** Bar graph representing the positions of the first hundred electronic transitions (blue) for **P2**. Calculated spectrum by applying a thickness of  $1000\text{cm}^{-1}$  to each bar (black). There is no vibronic component in these transitions. The assignments of the most intense transitions are provided.

**Table S4** Calculated positions of the 100 first electronic transitions, oscillator strength (F) and major contributions to these electronic transitions for **P2**.

| Wavelength (nm) | Osc. Strength | Major contributors (%)         |
|-----------------|---------------|--------------------------------|
| 401.3           | 0.0346        | HOMO→LUMO (98%)                |
| 377.0           | 0.002         | H-1→LUMO (98%)                 |
| 356.3           | 0.0035        | H-2→LUMO (99%)                 |
| 339.1           | 0.0057        | HOMO→L+1 (98%)                 |
| 314.7           | 0             | H-1→L+1 (98%)                  |
| 313.2           | 0.0006        | H-4→LUMO (91%)                 |
| 307.8           | 0.0135        | H-7→LUMO (17%), H-3→LUMO (75%) |
| 298.3           | 0             | H-2→L+1 (98%)                  |

|       |        |                                                                            |
|-------|--------|----------------------------------------------------------------------------|
| 294.8 | 0.0371 | HOMO→L+2 (96%)                                                             |
| 289.1 | 0.0737 | HOMO→L+3 (95%)                                                             |
| 283.6 | 0.0029 | H-8→LUMO (29%), H-7→LUMO (37%), H-6→LUMO (18%)                             |
| 280.3 | 0.0049 | H-8→LUMO (29%), H-7→LUMO (28%), H-6→LUMO (15%), H-3→LUMO (10%)             |
| 278.4 | 0.0447 | HOMO→L+4 (85%)                                                             |
| 276.7 | 0.007  | H-11→LUMO (14%), H-10→LUMO (14%), H-9→LUMO (55%), H-5→LUMO (10%)           |
| 276.0 | 0.0011 | H-6→LUMO (16%), H-5→LUMO (71%)                                             |
| 273.5 | 0.0024 | H-11→LUMO (19%), H-8→LUMO (22%), H-6→LUMO (43%), H-5→LUMO (12%)            |
| 268.3 | 0.0076 | HOMO→L+5 (55%), HOMO→L+6 (18%)                                             |
| 267.4 | 0.0196 | H-13→LUMO (29%), H-12→LUMO (17%), H-1→L+2 (21%)                            |
| 266.8 | 0.0154 | H-4→L+1 (18%), H-1→L+2 (54%)                                               |
| 266.6 | 0.0003 | H-4→L+1 (72%), H-1→L+2 (15%)                                               |
| 265.8 | 0.0008 | H-7→L+1 (14%), H-3→L+1 (61%)                                               |
| 265.1 | 0.0003 | H-11→LUMO (39%), H-10→LUMO (41%)                                           |
| 264.4 | 0.0052 | H-1→L+3 (69%), HOMO→L+5 (10%)                                              |
| 263.6 | 0.0241 | HOMO→L+5 (12%), HOMO→L+6 (49%), HOMO→L+7 (16%)                             |
| 263.0 | 0.0092 | H-12→LUMO (23%), H-11→LUMO (20%), H-10→LUMO (17%), H-9→LUMO (22%)          |
| 261.5 | 0.006  | H-2→L+2 (81%)                                                              |
| 258.3 | 0.001  | H-13→LUMO (49%), H-12→LUMO (37%)                                           |
| 257.5 | 0.0163 | H-2→L+3 (14%), HOMO→L+6 (17%), HOMO→L+7 (52%)                              |
| 256.1 | 0.0075 | H-14→LUMO (60%), H-1→L+4 (21%)                                             |
| 255.0 | 0.014  | H-14→LUMO (32%), H-2→L+3 (10%), H-1→L+4 (44%)                              |
| 251.7 | 0.0158 | H-2→L+3 (47%), HOMO→L+7 (11%), HOMO→L+8 (17%)                              |
| 251.1 | 0.004  | H-8→L+1 (10%), H-7→L+1 (13%), HOMO→L+8 (42%)                               |
| 250.8 | 0.0066 | H-8→L+1 (20%), H-7→L+1 (21%), H-6→L+1 (12%), HOMO→L+8 (22%)                |
| 249.4 | 0.0095 | H-2→L+4 (26%), H-1→L+5 (14%), H-1→L+6 (10%), HOMO→L+9 (26%)                |
| 248.4 | 0.0044 | H-2→L+4 (43%), H-1→L+5 (22%), H-1→L+6 (12%)                                |
| 247.8 | 0.002  | H-8→L+1 (22%), H-7→L+1 (28%), H-6→L+1 (10%), H-3→L+1 (10%), HOMO→L+9 (13%) |
| 247.3 | 0.0093 | H-1→L+5 (12%), HOMO→L+9 (44%)                                              |
| 245.7 | 0.0041 | H-11→L+1 (15%), H-10→L+1 (13%), H-9→L+1 (56%), H-5→L+1 (12%)               |
| 244.8 | 0.0033 | H-6→L+1 (14%), H-5→L+1 (70%)                                               |
| 243.3 | 0.0029 | H-6→L+1 (17%), H-1→L+6 (13%), H-1→L+7 (27%)                                |
| 242.9 | 0.0046 | H-11→L+1 (11%), H-8→L+1 (16%), H-6→L+1 (28%), H-1→L+7 (16%)                |
| 240.8 | 0.0134 | H-2→L+4 (10%), H-2→L+5 (52%), H-2→L+6 (13%)                                |
| 237.8 | 0.0045 | H-13→L+1 (14%), H-2→L+6 (16%), H-2→L+7 (27%)                               |
| 237.2 | 0.0138 | H-13→L+1 (20%), H-12→L+1 (14%), H-10→L+1 (23%)                             |
| 236.6 | 0.0001 | H-5→L+2 (14%), H-1→L+6 (24%), H-1→L+7 (29%)                                |
| 236.4 | 0.0006 | H-11→L+1 (16%), H-10→L+1 (13%), H-4→L+2 (35%), H-3→L+2 (10%)               |

|       |        |                                                                 |
|-------|--------|-----------------------------------------------------------------|
| 236.2 | 0.003  | H-11→L+1 (26%), H-10→L+1 (13%), H-4→L+2 (25%)                   |
| 235.0 | 0.0037 | H-4→L+2 (10%), H-3→L+2 (29%)                                    |
| 234.6 | 0.0001 | H-12→L+1 (30%), H-11→L+1 (13%), H-10→L+1 (14%), H-9→L+1 (17%)   |
| 234.2 | 0.0035 | H-5→L+2 (20%), H-1→L+7 (10%)                                    |
| 233.4 | 0.0096 | H-4→L+3 (20%), H-3→L+2 (13%), H-3→L+3 (28%)                     |
| 233.0 | 0.0102 | H-7→L+3 (10%), H-3→L+3 (23%)                                    |
| 231.6 | 0.0019 | H-4→L+3 (41%)                                                   |
| 231.4 | 0.0186 | H-15→LUMO (16%), H-13→L+1 (15%), H-12→L+1 (13%)                 |
| 230.7 | 0.0042 | H-2→L+6 (10%), H-2→L+7 (24%)                                    |
| 229.5 | 0.0115 | H-15→LUMO (21%), H-14→L+1 (30%), H-13→L+1 (26%), H-12→L+1 (11%) |
| 229.0 | 0.0017 | H-6→L+3 (13%), H-2→L+6 (15%), H-2→L+7 (15%)                     |
| 227.0 | 0.0208 | H-7→L+2 (19%), H-1→L+8 (43%)                                    |
| 226.8 | 0.0127 | H-15→LUMO (28%), H-14→L+1 (53%)                                 |
| 226.0 | 0.0261 | H-7→L+2 (32%), H-1→L+8 (24%)                                    |
| 225.8 | 0.0227 | H-4→L+4 (57%), H-4→L+5 (10%)                                    |
| 225.1 | 0.004  | H-1→L+9 (55%)                                                   |
| 224.5 | 0.0038 | H-6→L+2 (19%), H-5→L+3 (55%)                                    |
| 224.0 | 0.0147 | H-7→L+3 (17%), H-5→L+3 (13%), H-3→L+4 (10%), H-1→L+9 (17%)      |
| 223.5 | 0.0073 | H-7→L+3 (35%), H-3→L+4 (13%)                                    |
| 223.2 | 0.0007 | H-2→L+8 (72%), H-2→L+9 (15%)                                    |
| 221.8 | 0.0106 | H-10→L+3 (16%), H-6→L+2 (17%), H-6→L+3 (10%)                    |
| 221.4 | 0.0081 | H-9→L+2 (10%), H-6→L+3 (13%), H-5→L+2 (10%)                     |
| 220.5 | 0.0016 | H-2→L+8 (11%), H-2→L+9 (44%)                                    |
| 220.0 | 0.0069 | H-4→L+5 (30%), H-4→L+6 (14%), H-2→L+9 (23%)                     |
| 220.0 | 0.0027 | H-11→L+2 (13%), H-10→L+2 (28%), H-3→L+5 (10%)                   |
| 219.4 | 0.0095 | H-10→L+2 (16%), H-3→L+5 (15%), H-3→L+6 (14%)                    |
| 218.3 | 0.0179 | HOMO→L+10 (64%)                                                 |
| 217.0 | 0.0032 | H-9→L+3 (15%), H-8→L+2 (19%), H-5→L+4 (19%)                     |
| 216.4 | 0.0031 | H-9→L+3 (12%), H-4→L+7 (16%)                                    |
| 216.3 | 0.0118 | H-8→L+2 (15%), H-4→L+7 (13%)                                    |
| 215.2 | 0.0209 | H-8→L+2 (14%), H-5→L+4 (13%)                                    |
| 214.9 | 0.032  | H-4→L+7 (10%), H-3→L+7 (18%)                                    |
| 214.4 | 0.0256 | H-12→L+2 (11%), H-9→L+2 (20%), H-6→L+4 (34%)                    |
| 214.0 | 0.0113 | H-8→L+3 (60%)                                                   |
| 213.6 | 0.0143 | H-11→L+2 (30%), H-9→L+2 (19%), H-7→L+4 (13%)                    |
| 212.8 | 0.0301 | H-12→L+2 (23%), H-11→L+2 (15%), H-8→L+2 (10%), H-7→L+4 (14%)    |
| 212.2 | 0.043  | H-12→L+3 (21%)                                                  |
| 210.8 | 0.0022 | H-9→L+4 (10%), H-8→L+4 (10%), H-3→L+6 (18%), H-3→L+7 (12%)      |
| 210.4 | 0.0027 | H-12→L+3 (17%), H-7→L+4 (12%)                                   |
| 209.9 | 0.0035 | H-4→L+5 (12%), H-4→L+6 (30%), H-4→L+7 (33%)                     |
| 209.4 | 0.0015 | H-11→L+3 (22%), H-10→L+3 (21%), H-9→L+3 (42%)                   |
| 209.2 | 0.0086 | H-11→L+3 (12%), H-10→L+4 (18%), H-5→L+6 (13%)                   |

|       |        |                                                              |
|-------|--------|--------------------------------------------------------------|
| 208.7 | 0.0064 | H-20→LUMO (32%), H-16→LUMO (48%)                             |
| 208.0 | 0.0094 | H-8→L+4 (38%)                                                |
| 207.5 | 0.0027 | H-9→L+4 (18%), H-7→L+5 (10%), HOMO→L+11 (10%)                |
| 207.2 | 0.0043 | H-13→L+2 (59%)                                               |
| 207.2 | 0.006  | H-13→L+3 (11%), H-12→L+3 (13%), H-11→L+4 (11%)               |
| 206.2 | 0.0182 | H-9→L+4 (27%), H-7→L+5 (15%)                                 |
| 206.2 | 0.0667 | H-11→L+4 (22%), H-10→L+4 (20%)                               |
| 205.8 | 0.009  | H-7→L+5 (14%), H-5→L+5 (11%), HOMO→L+11 (34%)                |
| 205.6 | 0.039  | H-6→L+5 (21%), H-5→L+5 (32%), H-3→L+8 (10%)                  |
| 205.2 | 0.0025 | H-13→L+3 (21%), H-12→L+4 (15%), H-6→L+6 (16%), H-5→L+5 (11%) |
| 204.6 | 0.0003 | H-4→L+8 (32%), H-4→L+9 (10%)                                 |
| 204.2 | 0.0225 | H-4→L+8 (23%), H-3→L+8 (13%), HOMO→L+11 (13%)                |

**Table S5** Geometric parameters about the Cu atom for compound **P2** in the S<sub>0</sub> and T<sub>1</sub> states.

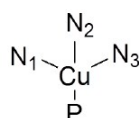

| Geometric Parameter |                                   | Singlet State | Triplet State | Difference |
|---------------------|-----------------------------------|---------------|---------------|------------|
| Bond Length<br>(Å)  | P-Cu                              | 2.2917        | 2.4562        | 0.1645     |
|                     | N <sub>1</sub> -Cu                | 2.1685        | 2.0505        | 0.118      |
|                     | N <sub>2</sub> -Cu                | 2.2118        | 1.9678        | 0.244      |
|                     | N <sub>3</sub> -Cu                | 2.1321        | 2.0555        | 0.0766     |
| Bond Angle<br>(°)   | P-Cu-N <sub>1</sub>               | 115.7127      | 100.2039      | 15.5088    |
|                     | P-Cu-N <sub>2</sub>               | 120.7304      | 136.9787      | 16.2483    |
|                     | P-Cu-N <sub>3</sub>               | 118.2728      | 104.6745      | 13.5983    |
|                     | N <sub>1</sub> -Cu-N <sub>2</sub> | 88.0893       | 92.7585       | 4.6692     |
|                     | N <sub>2</sub> -Cu-N <sub>3</sub> | 91.4159       | 96.2704       | 4.8545     |
|                     | N <sub>3</sub> -Cu-N <sub>1</sub> | 116.5384      | 131.6441      | 15.1057    |

**Table S6** Conformational analysis comparing the optimized structures of the singlet and triplet states of **P2**.

| Atom ID |        |    |    |    | Singlet State |        |        | Triplet State |        |        | Conformation Change |         |            |
|---------|--------|----|----|----|---------------|--------|--------|---------------|--------|--------|---------------------|---------|------------|
| Tag     | Symbol | NA | NB | NC | X             | Y      | Z      | X             | Y      | Z      | Δ Bond              | Δ Angle | Δ Dihedral |
| 1       | C      |    |    |    | -2.510        | -1.381 | -1.562 | -2.940        | -1.350 | -1.153 |                     |         |            |
| 2       | C      | 1  |    |    | -3.658        | -1.603 | -2.323 | -4.166        | -1.533 | -1.750 | -0.02               |         |            |
| 3       | C      | 2  | 1  |    | -4.405        | -0.507 | -2.752 | -4.998        | -0.435 | -2.059 | 0.02                | 2.17    |            |
| 4       | C      | 3  | 2  | 1  | -3.980        | 0.774  | -2.405 | -4.479        | 0.850  | -1.787 | 0.02                | -2.16   | 3.11       |
| 5       | C      | 4  | 3  | 2  | -2.816        | 0.917  | -1.647 | -3.248        | 1.008  | -1.194 | -0.02               | 2.12    | -3.25      |
| 6       | N      | 5  | 4  | 3  | -2.096        | -0.142 | -1.239 | -2.454        | -0.079 | -0.810 | 0.05                | 0.42    | -0.81      |
| 7       | H      | 3  | 2  | 1  | -5.302        | -0.649 | -3.347 | -5.968        | -0.569 | -2.521 | 0.00                | 1.05    | -359.33    |



|    |    |    |    |    |        |        |        |        |        |        |       |        |         |
|----|----|----|----|----|--------|--------|--------|--------|--------|--------|-------|--------|---------|
| 8  | H  | 2  | 1  | 6  | -3.957 | -2.615 | -2.578 | -4.479 | -2.544 | -1.999 | 0.00  | -1.54  | 0.27    |
| 9  | H  | 4  | 3  | 2  | -4.535 | 1.650  | -2.724 | -5.039 | 1.738  | -2.070 | 0.00  | -0.61  | -4.32   |
| 10 | C  | 1  | 6  | 5  | -1.652 | -2.519 | -1.046 | -2.010 | -2.501 | -0.919 | -0.02 | 5.47   | 3.89    |
| 11 | H  | 10 | 1  | 6  | -0.602 | -2.324 | -1.287 | -1.059 | -2.360 | -1.452 | 0.00  | 1.77   | 168.72  |
| 12 | H  | 10 | 1  | 6  | -1.941 | -3.460 | -1.516 | -2.456 | -3.433 | -1.266 | 0.00  | 0.12   | 167.78  |
| 13 | C  | 5  | 4  | 3  | -2.270 | 2.281  | -1.277 | -2.619 | 2.361  | -1.084 | -0.02 | -0.96  | -6.54   |
| 14 | H  | 13 | 5  | 4  | -2.847 | 3.062  | -1.773 | -3.322 | 3.131  | -1.400 | 0.00  | 0.29   | 13.78   |
| 15 | H  | 13 | 5  | 4  | -1.231 | 2.359  | -1.618 | -1.729 | 2.430  | -1.731 | 0.01  | 1.41   | 12.91   |
| 16 | N  | 13 | 5  | 4  | -2.294 | 2.563  | 0.154  | -2.167 | 2.717  | 0.266  | 0.01  | 0.49   | 13.94   |
| 17 | C  | 16 | 13 | 5  | -2.944 | 3.580  | 0.796  | -2.563 | 3.745  | 1.057  | -0.01 | 1.29   | 1.14    |
| 18 | C  | 16 | 13 | 5  | -1.520 | 2.543  | 2.171  | -0.824 | 2.679  | 1.974  | 0.01  | 0.18   | -8.44   |
| 19 | C  | 17 | 16 | 13 | -2.471 | 3.582  | 2.095  | -1.720 | 3.741  | 2.161  | 0.01  | 0.29   | -3.66   |
| 20 | H  | 19 | 17 | 16 | -2.768 | 4.255  | 2.886  | -1.749 | 4.429  | 2.993  | 0.00  | 0.01   | 359.70  |
| 21 | N  | 10 | 1  | 6  | -1.775 | -2.691 | 0.396  | -1.680 | -2.677 | 0.501  | 0.01  | 0.31   | -192.17 |
| 22 | C  | 21 | 10 | 1  | -2.335 | -3.733 | 1.077  | -2.093 | -3.635 | 1.366  | -0.01 | 1.06   | -5.27   |
| 23 | C  | 22 | 21 | 10 | -2.210 | -3.422 | 2.419  | -1.658 | -3.239 | 2.625  | 0.01  | 0.34   | 8.41    |
| 24 | C  | 23 | 22 | 21 | -1.569 | -2.169 | 2.478  | -1.004 | -2.012 | 2.455  | -0.01 | 0.29   | 0.76    |
| 25 | H  | 23 | 22 | 21 | -2.536 | -4.027 | 3.253  | -1.804 | -3.772 | 3.553  | 0.00  | 0.03   | -0.01   |
| 26 | N  | 24 | 23 | 22 | -1.304 | -1.725 | 1.239  | -1.011 | -1.678 | 1.146  | 0.01  | -0.88  | -0.98   |
| 27 | N  | 18 | 16 | 13 | -1.420 | 1.922  | 0.987  | -1.108 | 2.051  | 0.811  | 0.01  | -0.45  | 7.63    |
| 28 | Cu | 27 | 18 | 16 | -0.550 | 0.091  | 0.326  | -0.772 | 0.120  | 0.191  | -0.16 | -11.53 | -7.36   |
| 29 | C  | 22 | 21 | 10 | -2.925 | -4.938 | 0.415  | -2.869 | -4.843 | 0.947  | 0.00  | -0.39  | 7.41    |
| 30 | H  | 29 | 22 | 21 | -3.288 | -5.629 | 1.179  | -3.058 | -5.475 | 1.817  | 0.00  | 0.17   | -0.56   |
| 31 | H  | 29 | 22 | 21 | -3.775 | -4.683 | -0.230 | -3.838 | -4.569 | 0.514  | 0.00  | -0.65  | -0.48   |
| 32 | H  | 29 | 22 | 21 | -2.189 | -5.477 | -0.195 | -2.327 | -5.444 | 0.207  | 0.00  | -0.06  | -0.96   |
| 33 | C  | 24 | 23 | 22 | -1.218 | -1.386 | 3.704  | -0.419 | -1.138 | 3.519  | 0.00  | 0.11   | -2.63   |
| 34 | H  | 33 | 24 | 23 | -0.235 | -0.916 | 3.613  | 0.613  | -0.854 | 3.296  | 0.00  | 0.54   | -10.65  |
| 35 | H  | 33 | 24 | 23 | -1.954 | -0.596 | 3.893  | -1.009 | -0.223 | 3.644  | 0.00  | -0.20  | -9.96   |
| 36 | H  | 33 | 24 | 23 | -1.205 | -2.041 | 4.580  | -0.423 | -1.667 | 4.476  | 0.00  | -0.37  | -10.31  |
| 37 | C  | 18 | 16 | 13 | -0.669 | 2.156  | 3.340  | 0.323  | 2.286  | 2.853  | 0.00  | 0.67   | 8.52    |
| 38 | H  | 37 | 18 | 16 | -0.160 | 3.036  | 3.748  | 1.034  | 3.116  | 2.942  | 0.00  | -0.14  | -10.08  |
| 39 | H  | 37 | 18 | 16 | -1.267 | 1.724  | 4.150  | -0.017 | 2.044  | 3.866  | 0.00  | -0.38  | -10.49  |
| 40 | H  | 37 | 18 | 16 | 0.089  | 1.428  | 3.044  | 0.862  | 1.423  | 2.459  | 0.00  | 1.11   | -10.21  |
| 41 | C  | 17 | 16 | 13 | -3.944 | 4.474  | 0.132  | -3.696 | 4.658  | 0.713  | 0.00  | -0.25  | -3.51   |
| 42 | H  | 41 | 17 | 16 | -4.776 | 3.908  | -0.305 | -4.625 | 4.103  | 0.543  | 0.00  | -0.47  | -0.71   |
| 43 | H  | 41 | 17 | 16 | -4.364 | 5.161  | 0.870  | -3.866 | 5.356  | 1.536  | 0.00  | 0.12   | -0.51   |
| 44 | H  | 41 | 17 | 16 | -3.493 | 5.080  | -0.664 | -3.488 | 5.250  | -0.187 | 0.00  | -0.16  | -0.25   |
| 45 | P  | 28 | 27 | 18 | 1.676  | 0.081  | -0.216 | 1.632  | 0.035  | -0.303 | 0.16  | 18.71  | -17.48  |
| 46 | C  | 45 | 28 | 27 | 2.341  | 1.666  | -0.884 | 2.370  | 1.545  | -1.051 | 0.00  | 0.87   | 110.60  |
| 47 | C  | 46 | 45 | 28 | 3.360  | 1.713  | -1.849 | 3.440  | 1.438  | -1.957 | 0.00  | -2.34  | -0.84   |
| 48 | C  | 46 | 45 | 28 | 1.815  | 2.871  | -0.389 | 1.893  | 2.818  | -0.701 | 0.00  | 2.12   | -0.34   |
| 49 | C  | 47 | 46 | 45 | 3.841  | 2.941  | -2.307 | 4.022  | 2.584  | -2.496 | 0.00  | -0.09  | 0.76    |
| 50 | H  | 47 | 46 | 45 | 3.777  | 0.794  | -2.247 | 3.816  | 0.461  | -2.245 | 0.00  | 0.04   | 0.72    |

|    |   |    |    |    |       |        |        |       |        |        |       |       |         |
|----|---|----|----|----|-------|--------|--------|-------|--------|--------|-------|-------|---------|
| 51 | C | 48 | 46 | 45 | 2.304 | 4.097  | -0.843 | 2.481 | 3.963  | -1.243 | 0.00  | -0.21 | -0.49   |
| 52 | H | 48 | 46 | 45 | 1.021 | 2.847  | 0.352  | 1.061 | 2.915  | -0.015 | 0.00  | 0.38  | -0.98   |
| 53 | C | 49 | 47 | 46 | 3.316 | 4.134  | -1.805 | 3.544 | 3.848  | -2.140 | 0.00  | -0.09 | 0.02    |
| 54 | H | 49 | 47 | 46 | 4.629 | 2.965  | -3.055 | 4.847 | 2.490  | -3.195 | 0.00  | 0.00  | 359.87  |
| 55 | H | 51 | 48 | 46 | 1.893 | 5.022  | -0.448 | 2.104 | 4.943  | -0.967 | 0.00  | -0.10 | 359.59  |
| 56 | H | 53 | 49 | 47 | 3.694 | 5.088  | -2.162 | 3.998 | 4.740  | -2.563 | 0.00  | 0.03  | -0.20   |
| 57 | C | 45 | 28 | 27 | 2.117 | -1.155 | -1.518 | 1.798 | -1.227 | -1.634 | -0.01 | -8.75 | 116.47  |
| 58 | C | 57 | 45 | 28 | 3.084 | -2.153 | -1.329 | 2.761 | -2.247 | -1.618 | 0.00  | 0.43  | -9.98   |
| 59 | C | 57 | 45 | 28 | 1.429 | -1.100 | -2.744 | 0.935 | -1.117 | -2.740 | 0.00  | -0.76 | -6.46   |
| 60 | C | 58 | 57 | 45 | 3.355 | -3.076 | -2.343 | 2.855 | -3.141 | -2.687 | 0.00  | -0.21 | -356.58 |
| 61 | H | 58 | 57 | 45 | 3.629 | -2.212 | -0.393 | 3.443 | -2.344 | -0.780 | 0.00  | 0.30  | 3.12    |
| 62 | C | 59 | 57 | 45 | 1.710 | -2.015 | -3.758 | 1.038 | -2.008 | -3.808 | 0.00  | -0.20 | 356.95  |
| 63 | H | 59 | 57 | 45 | 0.680 | -0.329 | -2.911 | 0.188 | -0.327 | -2.774 | 0.00  | 0.33  | -3.23   |
| 64 | C | 60 | 58 | 57 | 2.672 | -3.009 | -3.558 | 1.996 | -3.024 | -3.781 | 0.00  | -0.01 | -0.10   |
| 65 | H | 60 | 58 | 57 | 4.107 | -3.843 | -2.182 | 3.606 | -3.925 | -2.664 | 0.00  | -0.02 | -0.11   |
| 66 | H | 62 | 59 | 57 | 1.179 | -1.952 | -4.705 | 0.371 | -1.907 | -4.660 | 0.00  | -0.10 | -0.32   |
| 67 | H | 64 | 60 | 58 | 2.890 | -3.724 | -4.347 | 2.076 | -3.719 | -4.612 | 0.00  | -0.08 | 0.10    |
| 68 | C | 45 | 28 | 27 | 2.781 | -0.329 | 1.202  | 2.784 | -0.473 | 1.035  | -0.01 | 4.85  | -242.54 |
| 69 | C | 68 | 45 | 28 | 3.993 | 0.336  | 1.440  | 3.803 | 0.380  | 1.486  | 0.00  | -1.43 | 18.77   |
| 70 | C | 68 | 45 | 28 | 2.380 | -1.350 | 2.082  | 2.610 | -1.722 | 1.660  | 0.00  | 1.31  | 16.47   |
| 71 | C | 69 | 68 | 45 | 4.787 | -0.014 | 2.535  | 4.637 | -0.012 | 2.535  | 0.00  | -0.04 | -1.91   |
| 72 | H | 69 | 68 | 45 | 4.318 | 1.130  | 0.775  | 3.953 | 1.346  | 1.016  | 0.00  | 0.05  | -2.59   |
| 73 | C | 70 | 68 | 45 | 3.181 | -1.705 | 3.167  | 3.454 | -2.113 | 2.700  | 0.00  | -0.16 | -358.07 |
| 74 | H | 70 | 68 | 45 | 1.441 | -1.870 | 1.913  | 1.823 | -2.394 | 1.329  | 0.00  | 0.35  | 2.20    |
| 75 | C | 71 | 69 | 68 | 4.385 | -1.035 | 3.397  | 4.468 | -1.258 | 3.141  | 0.00  | 0.02  | -0.16   |
| 76 | H | 71 | 69 | 68 | 5.721 | 0.512  | 2.709  | 5.424 | 0.656  | 2.872  | 0.00  | -0.06 | 359.52  |
| 77 | H | 73 | 70 | 68 | 2.864 | -2.501 | 3.835  | 3.319 | -3.085 | 3.166  | 0.00  | -0.14 | 0.31    |
| 78 | H | 75 | 71 | 69 | 5.006 | -1.306 | 4.247  | 5.122 | -1.563 | 3.952  | 0.00  | 0.04  | -0.31   |

### 2.3. DFT calculation results for P3

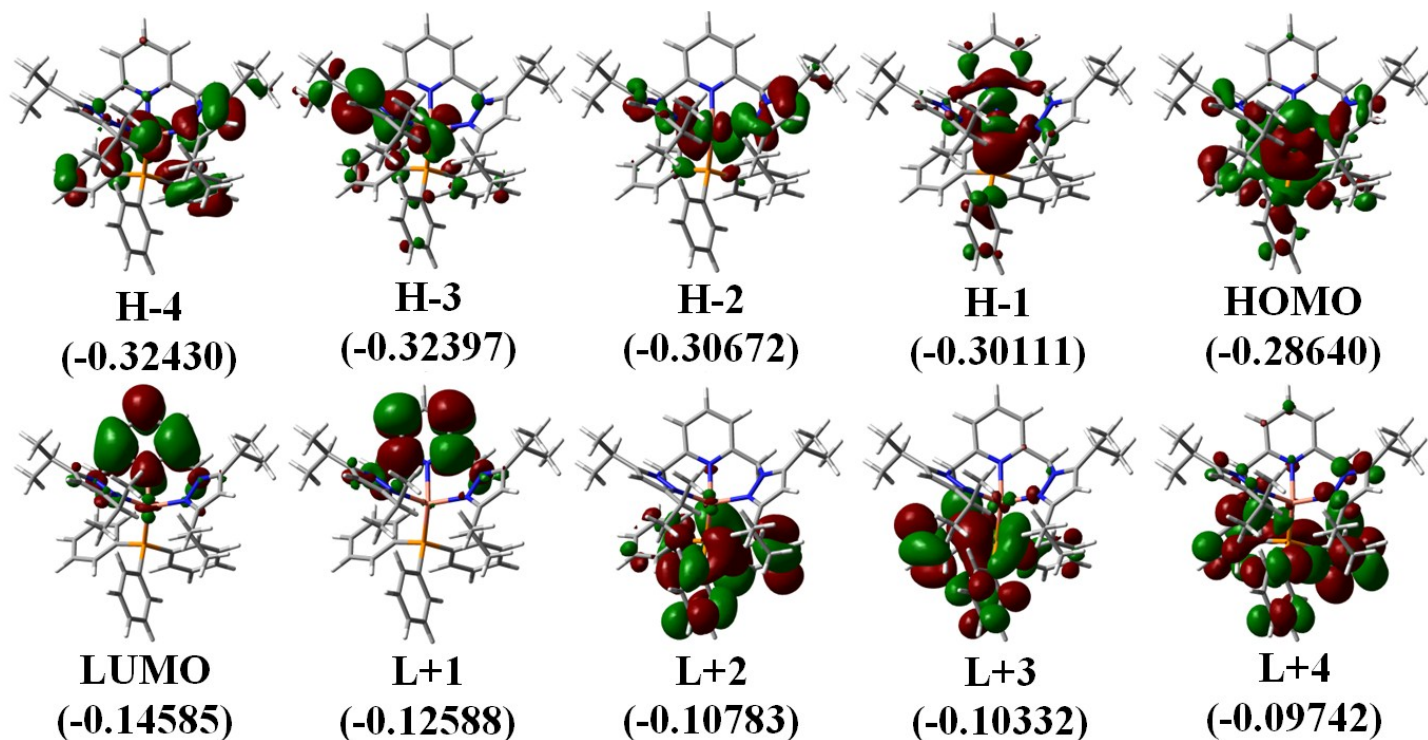

**Fig. S9** Representations of the frontier MOs for **P3**. The MO energies are in a.u.

**Table S7** Relative atomic contributions (in %) of the frontier MOs of compound **P3** separated by fragments. The grey boxes indicate the major contributions. (H = HOMO, L = LUMO)

| Molecular Fragment | H-4          | H-3          | H-2          | H-1          | HOMO         | LUMO         | L+1          | L+2          | L+3          | L+4          |
|--------------------|--------------|--------------|--------------|--------------|--------------|--------------|--------------|--------------|--------------|--------------|
| Pyridine           | 1.94         | 1.08         | 0.44         | 18.42        | 1.22         | <b>84.05</b> | <b>86.50</b> | 1.24         | 1.80         | 6.06         |
| Pyrazole groups    | 13.42        | 28.38        | 25.55        | 7.31         | 13.56        | 10.04        | 11.21        | 0.68         | 1.65         | 5.32         |
| Copper             | <b>70.18</b> | <b>59.61</b> | <b>68.43</b> | <b>67.82</b> | <b>45.49</b> | 2.44         | 0.54         | 2.05         | 3.51         | 5.58         |
| Triphenylphosphine | 12.73        | 7.51         | 3.16         | 5.67         | <b>38.55</b> | 1.54         | 0.87         | <b>95.44</b> | <b>92.45</b> | <b>78.26</b> |
| Isopropyl groups   | 1.73         | 3.42         | 2.42         | 0.78         | 1.17         | 1.92         | 0.88         | 0.59         | 0.59         | 4.78         |

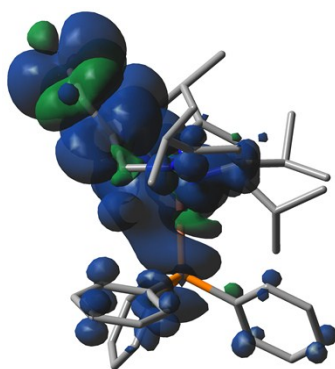

**Fig. S10** Side view image of the spin density distribution for **P3** showing the mixed MLCT and LLCT

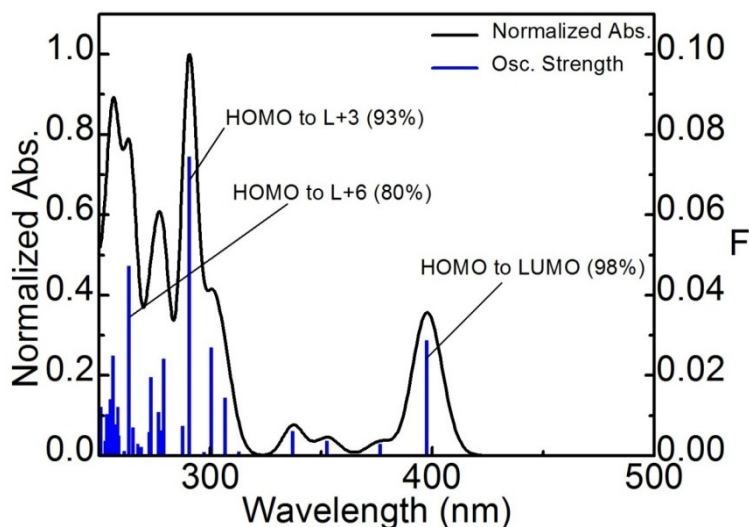

**Fig.S11** Bar graph representing the positions of the first hundred electronic transitions (blue) for **P3**. Calculated spectrum by applying a thickness of  $1000\text{cm}^{-1}$  to each bar (black). There is no vibronic component in these transitions. The assignments of the most intense transitions are provided.

**Table S8** Calculated positions of the 100 first electronic transitions, oscillator strength (F) and major contributions to these electronic transitions for **P3**.

| Wavelength (nm) | Osc. Strength | Major contributors (%)                         |
|-----------------|---------------|------------------------------------------------|
| 397.3           | 0.0288        | HOMO→LUMO (98%)                                |
| 376.4           | 0.0029        | H-1→LUMO (98%)                                 |
| 352.5           | 0.0037        | H-2→LUMO (98%)                                 |
| 337.2           | 0.0062        | HOMO→L+1 (98%)                                 |
| 315.9           | 0.0001        | H-1→L+1 (98%)                                  |
| 312.8           | 0.0011        | H-4→LUMO (21%), H-3→LUMO (69%)                 |
| 306.7           | 0.0145        | H-4→LUMO (66%), H-3→LUMO (17%)                 |
| 300.3           | 0.0269        | HOMO→L+2 (96%)                                 |
| 297.1           | 0.0009        | H-2→L+1 (98%)                                  |
| 290.4           | 0.0744        | HOMO→L+3 (93%)                                 |
| 287.4           | 0.0074        | H-5→LUMO (86%)                                 |
| 279.0           | 0.0242        | HOMO→L+4 (89%)                                 |
| 278.1           | 0.0063        | H-9→LUMO (53%), H-8→LUMO (33%)                 |
| 276.7           | 0.0109        | H-9→LUMO (33%), H-8→LUMO (12%), H-7→LUMO (19%) |
| 273.1           | 0.0196        | H-1→L+2 (84%)                                  |
| 272.6           | 0.0059        | HOMO→L+5 (73%)                                 |
| 270.6           | 0.0004        | H-12→LUMO (11%), H-6→LUMO (72%)                |
| 268.8           | 0.0022        | H-8→LUMO (32%), H-7→LUMO (39%)                 |
| 268.0           | 0.0014        | H-1→L+3 (71%)                                  |

|       |        |                                                                           |
|-------|--------|---------------------------------------------------------------------------|
| 267.8 | 0.0002 | H-4→L+1 (52%), H-3→L+1 (22%)                                              |
| 267.3 | 0.003  | H-13→LUMO (14%), H-12→LUMO (28%), H-6→LUMO (12%), H-3→L+1 (24%)           |
| 266.1 | 0.0003 | H-4→L+1 (32%), H-3→L+1 (37%), H-2→L+2 (11%)                               |
| 265.1 | 0.0071 | H-2→L+2 (72%)                                                             |
| 263.4 | 0.0473 | HOMO→L+6 (80%)                                                            |
| 261.1 | 0.0012 | H-10→LUMO (73%), H-7→LUMO (10%)                                           |
| 258.6 | 0.005  | H-11→LUMO (88%)                                                           |
| 258.3 | 0.0122 | H-14→LUMO (60%), H-2→L+3 (10%), HOMO→L+7 (12%)                            |
| 257.7 | 0.0078 | H-14→LUMO (21%), H-2→L+3 (12%), H-1→L+4 (23%), HOMO→L+7 (18%)             |
| 256.2 | 0.0249 | H-2→L+3 (16%), H-1→L+4 (45%), HOMO→L+7 (10%)                              |
| 254.9 | 0.0141 | H-5→L+1 (83%)                                                             |
| 254.4 | 0.0039 | H-2→L+3 (18%), H-1→L+5 (41%), HOMO→L+7 (10%)                              |
| 253.4 | 0.0104 | H-13→LUMO (11%), H-2→L+3 (19%), H-1→L+5 (13%), HOMO→L+7 (27%)             |
| 252.6 | 0.0037 | H-13→LUMO (50%), H-12→LUMO (22%)                                          |
| 251.7 | 0.0005 | H-1→L+5 (10%), HOMO→L+8 (77%)                                             |
| 250.7 | 0.0122 | HOMO→L+9 (65%)                                                            |
| 247.8 | 0.0119 | H-9→L+1 (15%), H-2→L+4 (63%)                                              |
| 247.5 | 0.0081 | H-9→L+1 (49%), H-8→L+1 (21%), H-2→L+4 (20%)                               |
| 245.6 | 0.0021 | H-9→L+1 (23%), H-8→L+1 (21%), H-7→L+1 (26%)                               |
| 244.7 | 0.0212 | H-4→L+2 (10%), H-2→L+5 (62%)                                              |
| 242.2 | 0.0044 | H-4→L+2 (11%), H-1→L+6 (56%)                                              |
| 241.2 | 0.0054 | H-12→L+1 (10%), H-6→L+1 (77%)                                             |
| 240.5 | 0.0094 | H-4→L+2 (17%), H-3→L+2 (30%), H-1→L+6 (15%), H-1→L+7 (10%), H-1→L+9 (10%) |
| 240.3 | 0.0061 | H-3→L+2 (39%), H-1→L+7 (13%), H-1→L+9 (13%)                               |
| 240.0 | 0.0022 | H-8→L+1 (27%), H-7→L+1 (38%)                                              |
| 238.5 | 0.0034 | H-13→L+1 (19%), H-12→L+1 (46%), H-6→L+1 (13%)                             |
| 238.4 | 0.0012 | H-4→L+2 (28%), H-1→L+7 (18%), H-1→L+9 (11%)                               |
| 236.7 | 0.0014 | H-6→L+2 (34%), H-1→L+8 (10%)                                              |
| 235.7 | 0.0013 | H-4→L+3 (59%)                                                             |
| 235.2 | 0.0019 | H-7→L+2 (10%), H-3→L+3 (19%), H-2→L+6 (17%)                               |
| 235.0 | 0.0131 | H-3→L+3 (18%), H-2→L+6 (35%)                                              |
| 234.3 | 0.0071 | H-10→L+1 (11%), H-3→L+3 (22%)                                             |
| 233.9 | 0.0038 | H-10→L+1 (56%)                                                            |
| 232.1 | 0.0017 | H-11→L+1 (10%), H-2→L+7 (22%), H-2→L+9 (22%)                              |
| 232.0 | 0.0055 | H-14→L+1 (10%), H-11→L+1 (65%)                                            |
| 231.3 | 0.0104 | H-1→L+8 (19%)                                                             |
| 231.0 | 0.0079 | H-15→LUMO (10%), H-14→L+1 (55%), H-11→L+1 (13%)                           |
| 229.6 | 0.0006 | H-1→L+7 (42%), H-1→L+9 (46%)                                              |
| 229.1 | 0.0148 | H-1→L+8 (36%)                                                             |

|       |        |                                                                 |
|-------|--------|-----------------------------------------------------------------|
| 228.1 | 0.0254 | H-15→LUMO (39%), H-14→L+1 (11%), H-13→L+1 (10%), H-12→L+1 (12%) |
| 227.9 | 0.0338 | H-7→L+2 (12%), H-5→L+2 (25%)                                    |
| 226.7 | 0.0098 | H-4→L+4 (31%), H-3→L+4 (21%), H-3→L+5 (10%)                     |
| 226.3 | 0.0133 | H-15→LUMO (13%), H-14→L+1 (12%), H-13→L+1 (47%), H-12→L+1 (14%) |
| 225.9 | 0.0058 | H-4→L+4 (29%), H-4→L+5 (16%), H-3→L+5 (21%)                     |
| 225.2 | 0.0015 | H-3→L+4 (15%), H-2→L+8 (64%)                                    |
| 224.6 | 0.0252 | H-4→L+5 (15%)                                                   |
| 224.4 | 0.0127 | H-4→L+5 (15%), H-3→L+4 (15%), H-3→L+5 (22%)                     |
| 224.2 | 0.0065 | H-7→L+2 (13%), H-5→L+2 (12%), H-3→L+4 (15%), H-2→L+8 (11%)      |
| 223.6 | 0.0128 | H-7→L+3 (12%), H-4→L+5 (10%), H-2→L+7 (14%)                     |
| 223.0 | 0.0059 | H-2→L+7 (27%), H-2→L+9 (34%)                                    |
| 222.7 | 0.0067 | H-10→L+2 (15%), H-7→L+3 (19%), H-6→L+3 (21%)                    |
| 222.3 | 0.0018 | H-10→L+2 (27%), H-6→L+3 (37%)                                   |
| 221.3 | 0.0053 | H-8→L+3 (10%), H-5→L+3 (21%)                                    |
| 220.5 | 0.0013 | H-11→L+2 (15%), H-9→L+2 (32%)                                   |
| 219.8 | 0.0015 | H-9→L+2 (42%), H-8→L+2 (16%), HOMO→L+10 (22%)                   |
| 219.5 | 0.0006 | H-8→L+3 (40%), H-5→L+3 (32%)                                    |
| 218.7 | 0.0156 | H-11→L+2 (18%), HOMO→L+10 (42%)                                 |
| 216.4 | 0.0057 | H-12→L+2 (17%), H-11→L+2 (18%), H-11→L+3 (12%)                  |
| 215.8 | 0.0049 | H-12→L+2 (20%), H-11→L+3 (13%), H-6→L+4 (10%)                   |
| 215.4 | 0.0038 | H-4→L+6 (21%), H-3→L+6 (26%)                                    |
| 215.0 | 0.0199 | H-10→L+3 (20%), H-7→L+4 (15%), H-4→L+6 (17%)                    |
| 214.1 | 0.0045 | H-4→L+7 (14%), H-4→L+9 (12%), H-3→L+6 (29%)                     |
| 213.8 | 0.0385 | H-12→L+2 (15%), H-12→L+3 (11%), H-5→L+4 (22%)                   |
| 213.5 | 0.016  | H-4→L+6 (24%)                                                   |
| 213.0 | 0.0027 | H-9→L+3 (78%)                                                   |
| 212.5 | 0.016  | H-12→L+3 (21%), H-7→L+4 (33%)                                   |
| 212.3 | 0.0194 | H-12→L+3 (14%), H-8→L+4 (14%), H-5→L+4 (14%)                    |
| 211.9 | 0.0204 | H-3→L+7 (30%), H-3→L+9 (20%)                                    |
| 211.7 | 0.0092 | H-13→L+2 (43%)                                                  |
| 210.2 | 0.0281 | H-9→L+4 (64%)                                                   |
| 210.1 | 0.0138 | H-13→L+2 (13%), H-8→L+4 (14%), H-6→L+5 (26%), H-6→L+6 (12%)     |
| 209.7 | 0.0121 | H-10→L+4 (24%), H-7→L+5 (14%)                                   |
| 209.6 | 0.0064 | H-13→L+3 (11%), H-12→L+3 (10%), H-10→L+4 (17%)                  |
| 208.9 | 0.0152 | H-11→L+4 (11%), H-5→L+5 (33%)                                   |
| 208.2 | 0.0015 | H-16→LUMO (11%), H-14→L+2 (46%)                                 |
| 207.8 | 0.0115 | H-14→L+2 (23%), H-4→L+8 (12%)                                   |
| 207.6 | 0.0049 | H-16→LUMO (17%), H-11→L+4 (10%), H-5→L+5 (15%)                  |
| 207.2 | 0.0098 | H-4→L+8 (38%), H-3→L+8 (22%)                                    |
| 207.0 | 0.0102 | H-13→L+3 (26%), H-11→L+4 (12%), H-3→L+8 (24%)                   |
| 206.8 | 0.0059 | H-8→L+5 (17%), H-7→L+5 (16%), H-5→L+5 (14%), H-3→L+8 (14%)      |

**Table S9** Geometric parameters about the Cu atom for compound **P3** in the S<sub>0</sub> and T<sub>1</sub> states.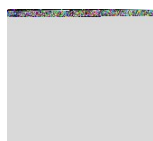

| Geometric Parameter |                                   | Singlet State | Triplet State | Difference |
|---------------------|-----------------------------------|---------------|---------------|------------|
| Bond Length<br>(Å)  | P-Cu                              | 2.3017        | 2.4816        | 0.1799     |
|                     | N <sub>1</sub> -Cu                | 2.1948        | 2.0514        | 0.1434     |
|                     | N <sub>2</sub> -Cu                | 2.2004        | 1.9616        | 0.2388     |
|                     | N <sub>3</sub> -Cu                | 2.1393        | 2.065         | 0.0743     |
| Bond Angle<br>(°)   | P-Cu-N <sub>1</sub>               | 116.9162      | 99.9871       | 16.9291    |
|                     | P-Cu-N <sub>2</sub>               | 120.3971      | 135.1859      | 14.7888    |
|                     | P-Cu-N <sub>3</sub>               | 115.7171      | 104.3478      | 11.3693    |
|                     | N <sub>1</sub> -Cu-N <sub>2</sub> | 86.6203       | 91.148        | 4.5277     |
|                     | N <sub>2</sub> -Cu-N <sub>3</sub> | 92.6067       | 97.064        | 4.4573     |
|                     | N <sub>3</sub> -Cu-N <sub>1</sub> | 118.6491      | 135.276       | 16.6269    |

**Table S10** Conformational analysis comparing the optimized structures of the singlet and triplet states of **P3**.

| Atom ID |        |    |    |    | Singlet State |        |        | Triplet State |        |        | Conformation Change |         |            |
|---------|--------|----|----|----|---------------|--------|--------|---------------|--------|--------|---------------------|---------|------------|
| Tag     | Symbol | NA | NB | NC | X             | Y      | Z      | X             | Y      | Z      | Δ Bond              | Δ Angle | Δ Dihedral |
| 1       | C      |    |    |    | 1.075         | -2.018 | -2.260 | 0.968         | -2.671 | -1.797 |                     |         |            |
| 2       | C      | 1  |    |    | 1.129         | -3.079 | -3.166 | 0.989         | -3.856 | -2.495 | -0.02               |         |            |
| 3       | C      | 2  | 1  |    | -0.059        | -3.561 | -3.710 | -0.208        | -4.498 | -2.877 | 0.02                | 2.15    |            |
| 4       | C      | 3  | 2  | 1  | -1.262        | -2.965 | -3.335 | -1.414        | -3.819 | -2.589 | 0.02                | -2.11   | 3.94       |
| 5       | C      | 4  | 3  | 2  | -1.236        | -1.901 | -2.432 | -1.409        | -2.631 | -1.896 | -0.02               | 2.02    | -4.13      |
| 6       | N      | 5  | 4  | 3  | -0.087        | -1.440 | -1.907 | -0.232        | -2.050 | -1.417 | 0.05                | 0.33    | -1.10      |
| 7       | H      | 3  | 2  | 1  | -0.048        | -4.385 | -4.418 | -0.202        | -5.437 | -3.416 | 0.00                | 1.00    | -359.21    |
| 8       | H      | 2  | 1  | 6  | 2.085         | -3.514 | -3.440 | 1.951         | -4.283 | -2.769 | 0.00                | -1.50   | 0.30       |
| 9       | H      | 4  | 3  | 2  | -2.205        | -3.312 | -3.744 | -2.363        | -4.214 | -2.943 | 0.00                | -0.57   | -5.53      |
| 10      | C      | 1  | 6  | 5  | 2.317         | -1.455 | -1.600 | 2.225         | -1.920 | -1.482 | -0.02               | 5.99    | 3.86       |
| 11      | H      | 10 | 1  | 6  | 2.286         | -0.362 | -1.630 | 2.193         | -0.902 | -1.891 | 0.00                | 1.52    | 167.73     |
| 12      | H      | 10 | 1  | 6  | 3.214         | -1.784 | -2.123 | 3.093         | -2.424 | -1.906 | 0.00                | 0.13    | 166.98     |
| 13      | C      | 5  | 4  | 3  | -2.499        | -1.162 | -2.041 | -2.647        | -1.799 | -1.793 | -0.02               | -0.73   | -7.17      |
| 14      | H      | 13 | 5  | 4  | -3.334        | -1.516 | -2.644 | -3.500        | -2.344 | -2.194 | 0.00                | 0.38    | 14.73      |
| 15      | H      | 13 | 5  | 4  | -2.366        | -0.094 | -2.249 | -2.534        | -0.874 | -2.381 | 0.01                | 1.26    | 13.79      |
| 16      | N      | 13 | 5  | 4  | -2.882        | -1.297 | -0.637 | -3.006        | -1.371 | -0.433 | 0.01                | 0.42    | 14.91      |
| 17      | C      | 16 | 13 | 5  | -4.062        | -1.771 | -0.131 | -4.155        | -1.596 | 0.255  | -0.01               | 1.01    | 0.58       |
| 18      | C      | 16 | 13 | 5  | -2.880        | -0.704 | 1.445  | -2.885        | -0.089 | 1.324  | 0.01                | 0.74    | -7.75      |

|    |    |    |    |    |        |        |        |        |        |        |       |        |         |
|----|----|----|----|----|--------|--------|--------|--------|--------|--------|-------|--------|---------|
| 19 | C  | 17 | 16 | 13 | -4.077 | -1.410 | 1.206  | -4.097 | -0.790 | 1.387  | 0.01  | 0.30   | -3.44   |
| 20 | H  | 19 | 17 | 16 | -4.855 | -1.631 | 1.921  | -4.844 | -0.720 | 2.163  | 0.00  | 0.00   | -0.40   |
| 21 | N  | 10 | 1  | 6  | 2.429  | -1.882 | -0.210 | 2.456  | -1.797 | -0.033 | 0.01  | 0.69   | -192.93 |
| 22 | C  | 21 | 10 | 1  | 3.340  | -2.736 | 0.347  | 3.382  | -2.414 | 0.747  | -0.01 | 0.77   | -2.78   |
| 23 | C  | 22 | 21 | 10 | 2.936  | -2.915 | 1.659  | 2.984  | -2.205 | 2.062  | 0.01  | 0.43   | 7.77    |
| 24 | C  | 23 | 22 | 21 | 1.763  | -2.149 | 1.824  | 1.787  | -1.473 | 2.011  | -0.01 | 0.27   | 0.64    |
| 25 | H  | 23 | 22 | 21 | 3.424  | -3.524 | 2.404  | 3.491  | -2.553 | 2.949  | 0.00  | -0.08  | -0.20   |
| 26 | N  | 24 | 23 | 22 | 1.457  | -1.518 | 0.681  | 1.482  | -1.211 | 0.723  | 0.01  | -1.01  | -1.23   |
| 27 | N  | 18 | 16 | 13 | -2.150 | -0.646 | 0.321  | -2.213 | -0.455 | 0.207  | 0.01  | -0.34  | 6.72    |
| 28 | Cu | 27 | 18 | 16 | -0.103 | -0.186 | -0.099 | -0.193 | -0.496 | -0.221 | -0.18 | -10.30 | -6.84   |
| 29 | C  | 22 | 21 | 10 | 4.550  | -3.270 | -0.382 | 4.594  | -3.123 | 0.195  | 0.00  | -0.50  | 6.84    |
| 30 | C  | 29 | 22 | 21 | 5.084  | -4.547 | 0.285  | 5.203  | -4.079 | 1.232  | 0.00  | 0.04   | -2.39   |
| 31 | C  | 29 | 22 | 21 | 5.658  | -2.198 | -0.480 | 5.648  | -2.111 | -0.308 | 0.00  | -0.05  | -2.55   |
| 32 | H  | 29 | 22 | 21 | 4.248  | -3.540 | -1.404 | 4.270  | -3.731 | -0.661 | 0.00  | -0.46  | -2.40   |
| 33 | H  | 30 | 29 | 22 | 4.311  | -5.319 | 0.356  | 4.468  | -4.808 | 1.589  | 0.00  | -0.02  | 0.14    |
| 34 | H  | 30 | 29 | 22 | 5.919  | -4.951 | -0.296 | 6.038  | -4.628 | 0.787  | 0.00  | -0.09  | -0.08   |
| 35 | H  | 30 | 29 | 22 | 5.455  | -4.341 | 1.295  | 5.593  | -3.531 | 2.098  | 0.00  | 0.10   | -0.06   |
| 36 | H  | 31 | 29 | 22 | 5.311  | -1.288 | -0.983 | 5.243  | -1.437 | -1.070 | 0.00  | -0.05  | 0.40    |
| 37 | H  | 31 | 29 | 22 | 6.004  | -1.914 | 0.520  | 6.015  | -1.497 | 0.522  | 0.00  | 0.05   | 0.53    |
| 38 | H  | 31 | 29 | 22 | 6.515  | -2.589 | -1.039 | 6.503  | -2.641 | -0.741 | 0.00  | -0.12  | 0.41    |
| 39 | C  | 24 | 23 | 22 | 0.915  | -2.044 | 3.064  | 0.869  | -1.134 | 3.157  | 0.00  | 0.42   | -5.88   |
| 40 | C  | 39 | 24 | 23 | 1.733  | -1.549 | 4.271  | 1.644  | -0.692 | 4.409  | 0.00  | 0.54   | -14.81  |
| 41 | C  | 39 | 24 | 23 | 0.244  | -3.398 | 3.374  | -0.030 | -2.351 | 3.472  | 0.00  | -1.02  | -14.29  |
| 42 | H  | 39 | 24 | 23 | 0.128  | -1.311 | 2.855  | 0.225  | -0.305 | 2.840  | 0.00  | 0.82   | -14.17  |
| 43 | H  | 40 | 39 | 24 | 2.217  | -0.587 | 4.064  | 2.306  | 0.155  | 4.202  | 0.00  | 0.27   | -0.33   |
| 44 | H  | 40 | 39 | 24 | 1.086  | -1.425 | 5.146  | 0.947  | -0.396 | 5.200  | 0.00  | -0.18  | -0.29   |
| 45 | H  | 40 | 39 | 24 | 2.519  | -2.265 | 4.538  | 2.259  | -1.509 | 4.803  | 0.00  | -0.01  | -0.65   |
| 46 | H  | 41 | 39 | 24 | -0.386 | -3.730 | 2.541  | -0.641 | -2.631 | 2.607  | 0.00  | 0.10   | -1.02   |
| 47 | H  | 41 | 39 | 24 | 0.995  | -4.175 | 3.560  | 0.579  | -3.219 | 3.749  | 0.00  | -0.42  | -1.17   |
| 48 | H  | 41 | 39 | 24 | -0.382 | -3.321 | 4.270  | -0.698 | -2.130 | 4.311  | 0.00  | 0.03   | 358.79  |
| 49 | C  | 18 | 16 | 13 | -2.457 | 0.003  | 2.709  | -2.403 | 0.981  | 2.273  | 0.00  | 1.27   | 5.60    |
| 50 | C  | 49 | 18 | 16 | -2.691 | -0.863 | 3.958  | -2.581 | 0.566  | 3.745  | 0.00  | -0.08  | 2.09    |
| 51 | C  | 49 | 18 | 16 | -3.191 | 1.355  | 2.843  | -3.143 | 2.310  | 2.006  | 0.00  | -0.06  | 2.81    |
| 52 | H  | 49 | 18 | 16 | -1.385 | 0.218  | 2.620  | -1.336 | 1.148  | 2.086  | 0.00  | 0.80   | 1.93    |
| 53 | H  | 50 | 49 | 18 | -2.192 | -1.834 | 3.881  | -2.091 | -0.387 | 3.963  | 0.00  | 0.08   | -0.13   |
| 54 | H  | 50 | 49 | 18 | -2.313 | -0.352 | 4.850  | -2.159 | 1.332  | 4.404  | 0.00  | -0.21  | -0.14   |
| 55 | H  | 50 | 49 | 18 | -3.760 | -1.048 | 4.116  | -3.642 | 0.462  | 4.000  | 0.00  | -0.01  | -0.17   |
| 56 | H  | 51 | 49 | 18 | -2.997 | 2.004  | 1.983  | -3.011 | 2.650  | 0.974  | 0.00  | 0.32   | 0.48    |
| 57 | H  | 51 | 49 | 18 | -4.274 | 1.207  | 2.921  | -4.218 | 2.199  | 2.190  | 0.00  | -0.28  | 0.32    |
| 58 | H  | 51 | 49 | 18 | -2.854 | 1.879  | 3.744  | -2.763 | 3.092  | 2.672  | 0.00  | -0.10  | 0.19    |
| 59 | C  | 17 | 16 | 13 | -5.104 | -2.494 | -0.951 | -5.246 | -2.528 | -0.215 | 0.00  | -0.28  | -3.41   |
| 60 | C  | 59 | 17 | 16 | -6.107 | -1.503 | -1.579 | -6.236 | -1.798 | -1.149 | 0.00  | -0.08  | 2.05    |
| 61 | C  | 59 | 17 | 16 | -5.836 | -3.553 | -0.108 | -5.982 | -3.165 | 0.975  | 0.00  | -0.05  | 2.01    |



|     |   |    |    |    |        |        |        |        |        |        |       |       |         |
|-----|---|----|----|----|--------|--------|--------|--------|--------|--------|-------|-------|---------|
| 62  | H | 59 | 17 | 16 | -4.592 | -3.026 | -1.764 | -4.774 | -3.341 | -0.782 | 0.00  | -0.32 | 1.92    |
| 63  | H | 60 | 59 | 17 | -5.611 | -0.754 | -2.208 | -5.737 | -1.362 | -2.021 | 0.00  | -0.02 | 0.20    |
| 64  | H | 60 | 59 | 17 | -6.833 | -2.038 | -2.201 | -6.998 | -2.496 | -1.511 | 0.00  | -0.20 | 0.00    |
| 65  | H | 60 | 59 | 17 | -6.658 | -0.968 | -0.798 | -6.745 | -0.988 | -0.614 | 0.00  | 0.15  | -0.08   |
| 66  | H | 61 | 59 | 17 | -5.136 | -4.270 | 0.332  | -5.290 | -3.691 | 1.641  | 0.00  | 0.03  | 0.33    |
| 67  | H | 61 | 59 | 17 | -6.407 | -3.090 | 0.704  | -6.518 | -2.412 | 1.563  | 0.00  | 0.10  | 0.59    |
| 68  | H | 61 | 59 | 17 | -6.544 | -4.105 | -0.735 | -6.721 | -3.887 | 0.613  | 0.00  | -0.11 | 0.55    |
| 69  | P | 28 | 27 | 18 | 0.410  | 2.054  | -0.231 | 0.434  | 1.893  | -0.459 | 0.18  | 19.47 | -26.56  |
| 70  | C | 69 | 28 | 27 | -0.850 | 3.101  | -1.080 | -0.692 | 2.836  | -1.564 | -0.01 | -1.87 | 106.77  |
| 71  | C | 70 | 69 | 28 | -0.514 | 4.265  | -1.791 | -0.237 | 3.975  | -2.253 | 0.00  | -1.90 | -3.55   |
| 72  | C | 70 | 69 | 28 | -2.202 | 2.731  | -0.984 | -2.027 | 2.430  | -1.721 | 0.00  | 1.67  | -4.44   |
| 73  | C | 71 | 70 | 69 | -1.510 | 5.039  | -2.391 | -1.106 | 4.696  | -3.072 | 0.00  | -0.14 | -0.39   |
| 74  | H | 71 | 70 | 69 | 0.525  | 4.566  | -1.883 | 0.795  | 4.297  | -2.155 | 0.00  | 0.09  | -0.44   |
| 75  | C | 72 | 70 | 69 | -3.196 | 3.511  | -1.579 | -2.893 | 3.155  | -2.544 | 0.00  | -0.21 | 0.73    |
| 76  | H | 72 | 70 | 69 | -2.474 | 1.832  | -0.438 | -2.387 | 1.549  | -1.202 | 0.00  | 0.26  | 0.45    |
| 77  | C | 75 | 72 | 70 | -2.851 | 4.665  | -2.285 | -2.435 | 4.287  | -3.218 | 0.00  | 0.03  | -0.29   |
| 78  | H | 73 | 71 | 70 | -1.235 | 5.936  | -2.939 | -0.745 | 5.575  | -3.597 | 0.00  | 0.03  | 359.75  |
| 79  | H | 75 | 72 | 70 | -4.238 | 3.216  | -1.491 | -3.923 | 2.831  | -2.659 | 0.00  | -0.07 | 359.57  |
| 80  | H | 77 | 75 | 72 | -3.623 | 5.270  | -2.752 | -3.108 | 4.849  | -3.860 | 0.00  | -0.05 | 0.11    |
| 81  | C | 69 | 28 | 27 | 1.964  | 2.428  | -1.161 | 2.044  | 1.959  | -1.355 | 0.00  | -6.83 | 112.98  |
| 82  | C | 81 | 69 | 28 | 3.114  | 2.934  | -0.539 | 3.240  | 2.368  | -0.750 | 0.00  | 0.43  | 0.56    |
| 83  | C | 81 | 69 | 28 | 2.013  | 2.129  | -2.536 | 2.067  | 1.540  | -2.700 | 0.00  | -0.63 | 1.96    |
| 84  | C | 82 | 81 | 69 | 4.285  | 3.138  | -1.275 | 4.435  | 2.361  | -1.475 | 0.00  | -0.16 | 1.42    |
| 85  | H | 82 | 81 | 69 | 3.100  | 3.177  | 0.518  | 3.247  | 2.710  | 0.279  | 0.00  | 0.32  | 0.79    |
| 86  | C | 83 | 81 | 69 | 3.180  | 2.344  | -3.269 | 3.261  | 1.542  | -3.421 | 0.00  | -0.18 | -1.22   |
| 87  | H | 83 | 81 | 69 | 1.129  | 1.746  | -3.041 | 1.148  | 1.235  | -3.194 | 0.00  | 0.27  | -0.96   |
| 88  | C | 84 | 82 | 81 | 4.322  | 2.846  | -2.638 | 4.450  | 1.948  | -2.808 | 0.00  | 0.01  | -0.19   |
| 89  | H | 84 | 82 | 81 | 5.167  | 3.535  | -0.779 | 5.353  | 2.690  | -0.996 | 0.00  | -0.04 | -0.34   |
| 90  | H | 86 | 83 | 81 | 3.196  | 2.123  | -4.333 | 3.261  | 1.229  | -4.461 | 0.00  | -0.10 | -0.16   |
| 91  | H | 88 | 84 | 82 | 5.231  | 3.013  | -3.209 | 5.379  | 1.952  | -3.371 | 0.00  | -0.06 | -0.03   |
| 92  | C | 69 | 28 | 27 | 0.652  | 2.859  | 1.410  | 0.654  | 2.922  | 1.049  | -0.01 | 5.59  | -247.64 |
| 93  | C | 92 | 69 | 28 | 0.279  | 4.186  | 1.673  | 0.057  | 4.184  | 1.190  | 0.00  | -0.72 | 13.92   |
| 94  | C | 92 | 69 | 28 | 1.235  | 2.098  | 2.438  | 1.425  | 2.409  | 2.109  | 0.00  | 0.67  | 12.60   |
| 95  | C | 93 | 92 | 69 | 0.492  | 4.740  | 2.937  | 0.239  | 4.922  | 2.362  | 0.00  | -0.07 | 359.00  |
| 96  | H | 93 | 92 | 69 | -0.183 | 4.788  | 0.897  | -0.548 | 4.596  | 0.389  | 0.00  | 0.10  | -1.53   |
| 97  | C | 94 | 92 | 69 | 1.456  | 2.659  | 3.697  | 1.612  | 3.156  | 3.272  | 0.00  | -0.08 | -359.04 |
| 98  | H | 94 | 92 | 69 | 1.518  | 1.067  | 2.248  | 1.887  | 1.430  | 2.020  | 0.00  | 0.38  | 1.34    |
| 99  | C | 95 | 93 | 92 | 1.082  | 3.981  | 3.949  | 1.017  | 4.413  | 3.402  | 0.00  | 0.08  | -0.14   |
| 100 | H | 95 | 93 | 92 | 0.195  | 5.768  | 3.129  | -0.227 | 5.899  | 2.456  | 0.00  | -0.11 | 359.59  |
| 101 | H | 97 | 94 | 92 | 1.913  | 2.063  | 4.481  | 2.219  | 2.754  | 4.078  | 0.00  | -0.07 | 0.36    |
| 102 | H | 99 | 95 | 93 | 1.247  | 4.416  | 4.931  | 1.160  | 4.992  | 4.310  | 0.00  | 0.05  | -0.20   |

## 2.4 DFT calculation results for P4

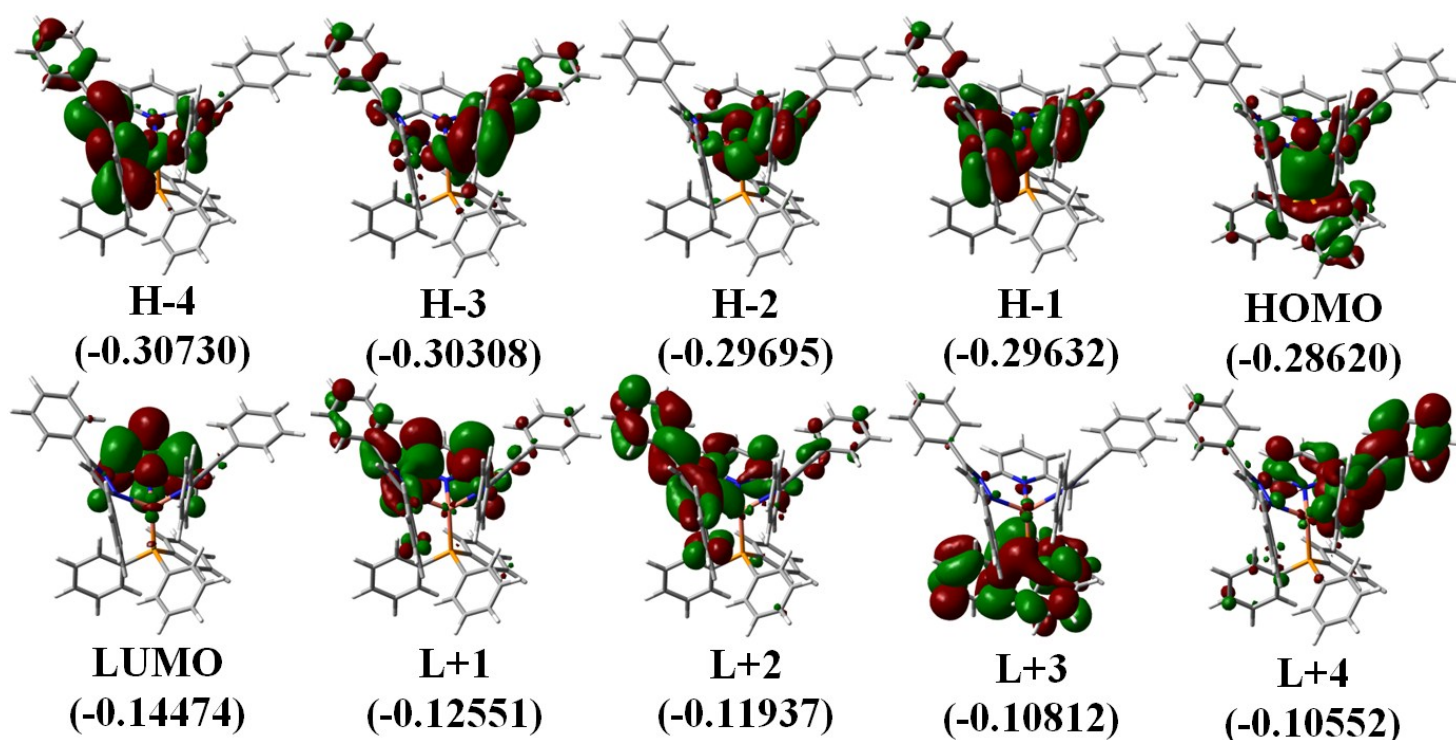

**Fig. S12** Representations of the frontier MOs for **P4**. The MO energies are in a.u.

**Table S11** Relative atomic contributions (in %) of the frontier MOs of compound **P4** separated by fragments. The grey boxes indicate the major contributions. (H = HOMO, L = LUMO)

| Molecular Fragment | H-4          | H-3          | H-2          | H-1          | HOMO         | LUMO         | L+1          | L+2          | L+3          | L+4          |
|--------------------|--------------|--------------|--------------|--------------|--------------|--------------|--------------|--------------|--------------|--------------|
| Pyridine           | 3.65         | 2.59         | 13.41        | 3.77         | 2.89         | <b>82.69</b> | <b>69.98</b> | 16.46        | 2.10         | 12.83        |
| Pyrazole groups    | 33.15        | 28.83        | 16.19        | <b>29.54</b> | 11.09        | 9.59         | 15.47        | <b>40.46</b> | 1.09         | <b>36.89</b> |
| Copper             | 15.24        | 28.36        | <b>58.92</b> | <b>28.10</b> | <b>43.40</b> | 1.53         | 1.64         | 2.20         | 2.01         | 0.90         |
| Triphenylphosphine | 2.62         | 3.23         | 2.27         | 1.19         | <b>37.94</b> | 2.62         | 2.19         | 5.30         | <b>91.85</b> | 5.10         |
| Phenyl groups      | <b>45.34</b> | <b>36.99</b> | 9.21         | <b>37.40</b> | 4.69         | 3.56         | 10.72        | <b>35.58</b> | 2.95         | <b>44.28</b> |

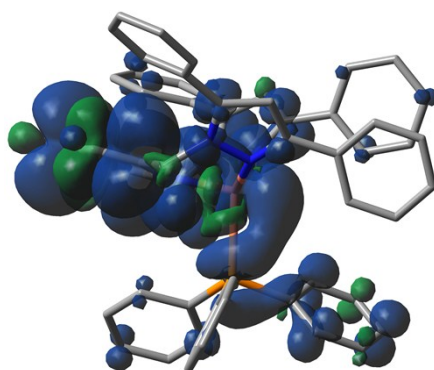

**Fig. S13** Side view image of the spin density distribution for **P4** showing the mixed MLCT and LLCT.

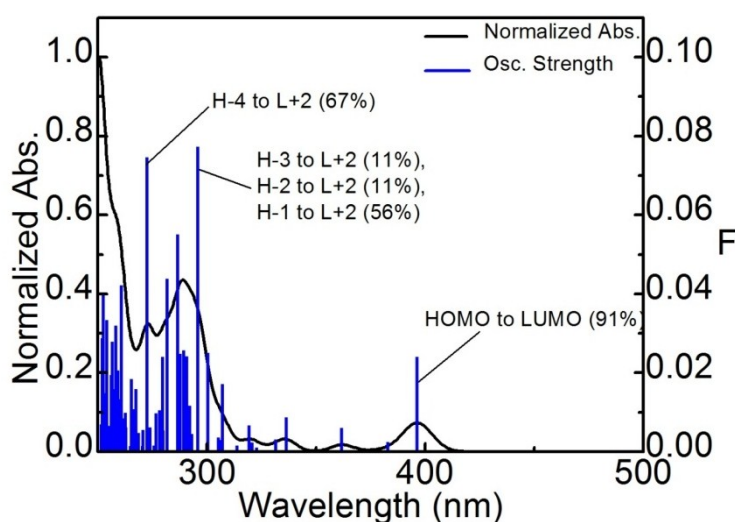

**Fig.S14** Bar graph representing the positions of the first hundred electronic transitions (blue). Calculated spectrum by applying a thickness of  $1000\text{cm}^{-1}$  to each bar (black). There is no vibronic component in these transitions. The assignments of the most intense transitions are provided.

**Table S12** Calculated positions of the 100 first electronic transitions, oscillator strength (F) and major contributors to these electronic transitions for **P4**.

| Wavelength (nm) | Osc. Strength | Major contributors (%)         |
|-----------------|---------------|--------------------------------|
| 396.1           | 0.024         | HOMO→LUMO (91%)                |
| 382.8           | 0.0025        | H-2→LUMO (80%)                 |
| 361.6           | 0.006         | H-3→LUMO (20%), H-1→LUMO (66%) |
| 336.2           | 0.0087        | HOMO→L+1 (98%)                 |
| 331.4           | 0.0031        | H-3→LUMO (68%), H-1→LUMO (19%) |
| 322.6           | 0.0011        | H-2→L+1 (50%), HOMO→L+2 (37%)  |

|       |        |                                                                            |
|-------|--------|----------------------------------------------------------------------------|
| 320.4 | 0.0023 | H-2→L+1 (32%), HOMO→L+2 (55%)                                              |
| 319.2 | 0.0067 | H-4→LUMO (79%)                                                             |
| 313.7 | 0.0015 | H-10→LUMO (17%), H-8→LUMO (32%), H-7→LUMO (28%), H-6→LUMO (12%)            |
| 306.9 | 0.0171 | H-2→L+2 (22%), H-1→L+1 (40%)                                               |
| 306.4 | 0.003  | H-9→LUMO (10%), H-6→LUMO (15%), H-2→L+2 (47%)                              |
| 305.2 | 0.0036 | H-9→LUMO (14%), H-8→LUMO (13%), H-6→LUMO (14%), H-1→L+1 (27%)              |
| 300.4 | 0.025  | HOMO→L+3 (91%)                                                             |
| 295.6 | 0.0773 | H-3→L+2 (11%), H-2→L+2 (11%), H-1→L+2 (56%)                                |
| 292.9 | 0.0045 | H-6→LUMO (16%), H-5→LUMO (58%)                                             |
| 292.0 | 0.0116 | H-6→LUMO (10%), H-5→LUMO (31%), HOMO→L+4 (35%)                             |
| 290.5 | 0.0242 | H-9→LUMO (16%), H-6→LUMO (20%), HOMO→L+4 (27%)                             |
| 289.2 | 0.0257 | H-3→L+1 (73%), H-1→L+1 (10%)                                               |
| 287.6 | 0.0248 | H-10→LUMO (59%), H-7→LUMO (10%)                                            |
| 286.4 | 0.055  | HOMO→L+4 (16%), HOMO→L+5 (75%)                                             |
| 281.5 | 0.0438 | H-4→L+1 (65%), H-3→L+2 (14%)                                               |
| 279.7 | 0.0054 | H-9→LUMO (10%), H-8→LUMO (31%), H-7→LUMO (45%)                             |
| 279.6 | 0.0057 | H-2→L+3 (63%), H-1→L+3 (10%)                                               |
| 279.4 | 0.024  | H-4→L+1 (19%), H-3→L+2 (52%)                                               |
| 278.1 | 0.0105 | H-2→L+4 (67%)                                                              |
| 276.6 | 0.0097 | HOMO→L+6 (79%)                                                             |
| 275.6 | 0.0016 | H-12→LUMO (14%), H-11→LUMO (57%)                                           |
| 273.9 | 0.0061 | H-3→L+3 (14%), H-1→L+3 (62%)                                               |
| 272.4 | 0.0746 | H-4→L+2 (67%)                                                              |
| 270.5 | 0.0055 | H-2→L+5 (57%)                                                              |
| 270.3 | 0.0014 | H-8→L+1 (29%), H-7→L+1 (22%), H-6→L+1 (13%), H-2→L+5 (12%)                 |
| 268.4 | 0.0048 | H-16→LUMO (10%), H-12→LUMO (34%), H-6→L+1 (18%)                            |
| 267.9 | 0.0008 | H-13→LUMO (84%)                                                            |
| 267.6 | 0.0035 | H-12→LUMO (21%), H-9→L+1 (12%), H-8→L+1 (10%), H-6→L+1 (25%)               |
| 267.2 | 0.0159 | H-14→LUMO (10%), H-1→L+4 (42%)                                             |
| 266.1 | 0.0107 | H-14→LUMO (57%)                                                            |
| 265.3 | 0.0184 | HOMO→L+7 (81%)                                                             |
| 264.8 | 0.0014 | H-15→LUMO (82%)                                                            |
| 262.7 | 0.0062 | H-5→L+1 (11%), H-1→L+5 (22%), HOMO→L+8 (25%)                               |
| 262.6 | 0.0099 | H-5→L+1 (40%), H-5→L+2 (13%), HOMO→L+8 (15%)                               |
| 261.9 | 0.0084 | H-10→L+2 (11%), H-8→L+2 (21%), H-7→L+2 (15%), H-6→L+2 (11%), H-5→L+1 (21%) |
| 261.5 | 0.0015 | H-16→LUMO (58%), H-12→LUMO (15%)                                           |
| 260.6 | 0.0421 | H-1→L+5 (31%), HOMO→L+8 (22%)                                              |
| 259.8 | 0.0133 | H-6→L+2 (10%), H-2→L+6 (51%)                                               |
| 259.1 | 0.0206 | H-7→L+1 (13%), H-5→L+2 (10%), H-3→L+4 (12%)                                |
| 259.0 | 0.0084 | H-9→L+2 (13%), H-6→L+2 (15%), H-2→L+6 (18%)                                |

---

|       |        |                                                               |
|-------|--------|---------------------------------------------------------------|
| 258.1 | 0.032  | H-17→LUMO (11%), H-3→L+4 (35%)                                |
| 258.0 | 0.0042 | H-3→L+3 (47%), H-1→L+3 (10%)                                  |
| 257.9 | 0.0159 | H-17→LUMO (57%)                                               |
| 256.5 | 0.0278 | H-9→L+1 (24%), H-6→L+1 (13%)                                  |
| 256.1 | 0.0194 | HOMO→L+9 (19%), HOMO→L+12 (42%)                               |
| 255.4 | 0.0018 | H-7→L+1 (11%), H-7→L+2 (22%), H-5→L+2 (32%)                   |
| 254.5 | 0.0065 | H-10→L+1 (10%), H-1→L+6 (44%)                                 |
| 253.9 | 0.0334 | H-10→L+1 (43%), HOMO→L+9 (12%)                                |
| 253.7 | 0.0148 | H-18→LUMO (24%), HOMO→L+9 (16%)                               |
| 253.4 | 0.0026 | H-18→LUMO (56%), H-10→L+1 (11%)                               |
| 252.3 | 0.0399 | H-4→L+3 (47%), H-2→L+7 (18%)                                  |
| 251.9 | 0.0288 | H-4→L+3 (26%), H-2→L+7 (46%)                                  |
| 251.4 | 0.0018 | HOMO→L+13 (64%)                                               |
| 251.3 | 0.0069 | H-19→LUMO (84%)                                               |
| 249.7 | 0.1864 | H-2→L+7 (19%), H-1→L+7 (52%)                                  |
| 249.1 | 0.0062 | H-3→L+5 (68%)                                                 |
| 248.5 | 0.0297 | H-4→L+4 (62%)                                                 |
| 248.3 | 0.0037 | H-15→L+1 (10%), H-15→L+2 (14%), HOMO→L+10 (15%)               |
| 247.9 | 0.0222 | H-8→L+1 (15%), H-7→L+1 (19%), H-7→L+2 (19%)                   |
| 246.1 | 0.0046 | H-11→L+1 (32%), H-2→L+8 (22%)                                 |
| 245.9 | 0.0009 | H-11→L+1 (25%), H-2→L+8 (35%)                                 |
| 245.5 | 0.0295 | H-9→L+2 (19%), H-6→L+2 (22%), HOMO→L+11 (12%)                 |
| 245.2 | 0.0009 | H-5→L+4 (14%), HOMO→L+11 (33%)                                |
| 245.1 | 0.0151 | H-9→L+2 (13%), H-5→L+4 (21%)                                  |
| 244.2 | 0.0015 | HOMO→L+10 (68%)                                               |
| 243.7 | 0.0126 | H-10→L+3 (13%), H-8→L+3 (23%), H-7→L+3 (21%)                  |
| 242.4 | 0.071  | H-2→L+8 (10%), H-1→L+8 (21%)                                  |
| 242.4 | 0.0005 | H-4→L+5 (52%)                                                 |
| 242.3 | 0.0295 | H-10→L+2 (41%)                                                |
| 242.1 | 0.0064 | H-3→L+6 (10%), H-2→L+9 (38%)                                  |
| 241.7 | 0.008  | H-3→L+6 (34%), H-1→L+8 (32%)                                  |
| 241.4 | 0.0025 | H-13→L+1 (42%), HOMO→L+11 (21%)                               |
| 241.3 | 0.0055 | H-20→LUMO (44%), H-13→L+1 (11%)                               |
| 241.0 | 0.0319 | H-20→LUMO (30%), H-8→L+4 (12%), H-7→L+4 (11%), H-3→L+7 (12%)  |
| 240.7 | 0.0066 | H-3→L+7 (59%)                                                 |
| 240.5 | 0.0126 | H-20→LUMO (12%), H-9→L+3 (12%), H-6→L+3 (14%), H-2→L+12 (14%) |
| 240.1 | 0.0064 | H-12→L+1 (56%), H-11→L+1 (11%)                                |
| 239.6 | 0.0599 | H-1→L+9 (53%)                                                 |
| 239.0 | 0.0079 | H-16→L+1 (15%), H-14→L+1 (44%)                                |
| 238.7 | 0.0102 | H-9→L+4 (15%), H-8→L+4 (10%), H-6→L+4 (15%)                   |
| 238.3 | 0.0023 | H-5→L+3 (58%)                                                 |
| 238.0 | 0.0008 | HOMO→L+14 (22%)                                               |

|       |        |                                                |
|-------|--------|------------------------------------------------|
| 237.6 | 0.0059 | HOMO→L+14 (23%)                                |
| 237.1 | 0.0088 | H-4→L+6 (13%), H-1→L+12 (12%)                  |
| 236.6 | 0.0015 | H-15→L+1 (48%), H-14→L+1 (10%), H-1→L+10 (13%) |
| 236.2 | 0.0024 | H-11→L+2 (15%), H-4→L+6 (18%), H-4→L+7 (13%)   |
| 236.0 | 0.0074 | H-11→L+2 (18%), H-4→L+6 (29%)                  |
| 236.0 | 0.0095 | H-10→L+5 (10%), H-8→L+5 (25%), H-7→L+5 (20%)   |
| 235.8 | 0.0058 | H-11→L+2 (12%), H-4→L+7 (10%), HOMO→L+14 (13%) |
| 235.4 | 0.0021 | H-16→L+1 (19%)                                 |
| 235.3 | 0.0014 | H-16→L+1 (15%), H-13→L+1 (12%)                 |
| 235.0 | 0.0175 | H-2→L+10 (14%), H-2→L+13 (22%)                 |
| 234.6 | 0.0123 | H-4→L+7 (12%), H-1→L+12 (20%)                  |
| 234.3 | 0.0287 | H-21→LUMO (44%)                                |

**Table S13** Geometric parameters about the Cu atom for compound **P4** in the  $S_0$  and  $T_1$  states.

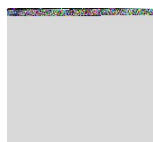

| Geometric Parameter |                                   | Singlet State | Triplet State | Difference |
|---------------------|-----------------------------------|---------------|---------------|------------|
| Bond Length<br>(Å)  | P-Cu                              | 2.3088        | 2.4296        | 0.1208     |
|                     | N <sub>1</sub> -Cu                | 2.1705        | 2.1728        | 0.0023     |
|                     | N <sub>2</sub> -Cu                | 2.2246        | 1.9359        | 0.2887     |
|                     | N <sub>3</sub> -Cu                | 2.1981        | 2.1104        | 0.0877     |
| Bond Angle<br>(°)   | P-Cu-N <sub>1</sub>               | 118.4592      | 110.3491      | 8.1101     |
|                     | P-Cu-N <sub>2</sub>               | 112.2002      | 100.7926      | 11.4076    |
|                     | P-Cu-N <sub>3</sub>               | 119.5786      | 121.6644      | 2.0858     |
|                     | N <sub>1</sub> -Cu-N <sub>2</sub> | 92.316        | 100.4184      | 8.1024     |
|                     | N <sub>2</sub> -Cu-N <sub>3</sub> | 87.5256       | 95.5447       | 8.0191     |
|                     | N <sub>3</sub> -Cu-N <sub>1</sub> | 116.8825      | 121.0389      | 4.1564     |

**Table S14** Conformational analysis comparing the optimized structures of the singlet and triplet states of **P4**.

| Atom ID |        | Singlet State |    |    | Triplet State |       |        | Conformation Change |       |        |        |         |            |
|---------|--------|---------------|----|----|---------------|-------|--------|---------------------|-------|--------|--------|---------|------------|
| Tag     | Symbol | NA            | NB | NC | X             | Y     | Z      | X                   | Y     | Z      | Δ Bond | Δ Angle | Δ Dihedral |
| 1       | C      |               |    |    | 0.923         | 1.996 | -2.195 | 0.271               | 1.698 | -2.357 |        |         |            |
| 2       | C      | 1             |    |    | 1.813         | 2.667 | -3.037 | 0.931               | 2.438 | -3.310 | -0.02  |         |            |
| 3       | C      | 2             | 1  |    | 3.129         | 2.216 | -3.122 | 2.335               | 2.343 | -3.472 | 0.02   | 2.42    |            |
| 4       | C      | 3             | 2  | 1  | 3.520         | 1.129 | -2.341 | 3.026               | 1.511 | -2.565 | 0.02   | -2.03   | -1.79      |
| 5       | C      | 4             | 3  | 2  | 2.576         | 0.521 | -1.511 | 2.354               | 0.785 | -1.608 | -0.02  | 2.33    | 1.97       |
| 6       | N      | 1             | 2  | 3  | 1.297         | 0.935 | -1.463 | 0.958               | 0.815 | -1.519 | 0.06   | -0.78   | -0.85      |

|    |    |    |    |    |        |        |        |        |        |        |       |        |         |
|----|----|----|----|----|--------|--------|--------|--------|--------|--------|-------|--------|---------|
| 7  | H  | 3  | 2  | 1  | 3.840  | 2.709  | -3.777 | 2.856  | 2.908  | -4.235 | 0.00  | 0.98   | -0.57   |
| 8  | H  | 2  | 1  | 6  | 1.476  | 3.522  | -3.615 | 0.347  | 3.094  | -3.950 | 0.00  | -1.77  | 358.70  |
| 9  | H  | 4  | 3  | 2  | 4.539  | 0.757  | -2.368 | 4.110  | 1.431  | -2.607 | 0.00  | -0.63  | 1.94    |
| 10 | C  | 1  | 6  | 5  | -0.535 | 2.394  | -2.119 | -1.222 | 1.711  | -2.250 | -0.02 | 4.95   | -353.93 |
| 11 | H  | 10 | 1  | 6  | -1.145 | 1.612  | -2.587 | -1.648 | 0.739  | -2.537 | 0.00  | 1.96   | 179.14  |
| 12 | H  | 10 | 1  | 6  | -0.696 | 3.321  | -2.670 | -1.635 | 2.466  | -2.918 | 0.00  | -0.01  | -181.86 |
| 13 | C  | 5  | 4  | 3  | 2.927  | -0.646 | -0.611 | 3.054  | -0.072 | -0.599 | -0.02 | 0.70   | 0.90    |
| 14 | H  | 13 | 5  | 4  | 3.975  | -0.921 | -0.731 | 4.133  | -0.051 | -0.753 | 0.00  | 0.27   | -0.53   |
| 15 | H  | 13 | 5  | 4  | 2.311  | -1.512 | -0.873 | 2.723  | -1.118 | -0.651 | 0.00  | 2.13   | -1.65   |
| 16 | N  | 13 | 5  | 4  | 2.713  | -0.344 | 0.798  | 2.802  | 0.375  | 0.780  | 0.01  | -0.17  | -0.71   |
| 17 | C  | 16 | 13 | 5  | 3.663  | -0.115 | 1.756  | 3.639  | 1.018  | 1.641  | -0.01 | 1.57   | 0.58    |
| 18 | C  | 16 | 13 | 5  | 1.606  | -0.097 | 2.636  | 1.647  | 0.658  | 2.598  | 0.01  | -1.04  | -7.91   |
| 19 | C  | 17 | 16 | 13 | 2.975  | 0.044  | 2.945  | 2.919  | 1.203  | 2.817  | 0.01  | 0.27   | -3.18   |
| 20 | H  | 19 | 17 | 16 | 3.409  | 0.219  | 3.918  | 3.283  | 1.657  | 3.726  | 0.00  | 0.00   | -0.41   |
| 21 | N  | 10 | 1  | 6  | -1.052 | 2.598  | -0.767 | -1.757 | 1.992  | -0.902 | 0.02  | 0.28   | -181.58 |
| 22 | C  | 21 | 10 | 1  | -1.565 | 3.766  | -0.261 | -2.571 | 3.021  | -0.526 | -0.01 | 1.34   | 1.37    |
| 23 | C  | 22 | 21 | 10 | -2.347 | 3.407  | 0.822  | -3.175 | 2.630  | 0.662  | 0.01  | 0.17   | 0.56    |
| 24 | C  | 23 | 22 | 21 | -2.286 | 1.999  | 0.914  | -2.694 | 1.340  | 0.952  | -0.01 | 0.06   | 0.30    |
| 25 | H  | 23 | 22 | 21 | -2.902 | 4.081  | 1.457  | -3.889 | 3.206  | 1.230  | 0.00  | -0.08  | -359.30 |
| 26 | N  | 24 | 23 | 22 | -1.482 | 1.510  | -0.051 | -1.810 | 0.961  | 0.000  | 0.01  | -0.33  | 0.08    |
| 27 | N  | 18 | 16 | 13 | 1.448  | -0.332 | 1.318  | 1.574  | 0.153  | 1.340  | 0.01  | -0.33  | 6.52    |
| 28 | Cu | 26 | 24 | 23 | -0.142 | -0.191 | -0.194 | 0.058  | -0.143 | -0.098 | -0.23 | -12.73 | 28.58   |
| 29 | C  | 22 | 21 | 10 | -1.302 | 5.100  | -0.821 | -2.741 | 4.271  | -1.283 | 0.00  | 0.24   | 0.51    |
| 30 | C  | 29 | 22 | 21 | -0.005 | 5.502  | -1.188 | -1.647 | 4.932  | -1.869 | 0.00  | -0.01  | 3.58    |
| 31 | C  | 29 | 22 | 21 | -2.360 | 6.015  | -0.954 | -4.019 | 4.848  | -1.381 | 0.00  | -0.14  | 3.81    |
| 32 | C  | 30 | 29 | 22 | 0.222  | 6.785  | -1.687 | -1.833 | 6.136  | -2.547 | 0.00  | -0.17  | 0.27    |
| 33 | H  | 30 | 29 | 22 | 0.829  | 4.821  | -1.049 | -0.649 | 4.512  | -1.774 | 0.00  | 0.11   | 1.12    |
| 34 | C  | 31 | 29 | 22 | -2.128 | 7.298  | -1.448 | -4.199 | 6.053  | -2.058 | 0.00  | -0.04  | -0.19   |
| 35 | H  | 31 | 29 | 22 | -3.366 | 5.711  | -0.679 | -4.871 | 4.340  | -0.939 | 0.00  | 0.12   | -0.34   |
| 36 | C  | 32 | 30 | 29 | -0.838 | 7.685  | -1.819 | -3.108 | 6.698  | -2.644 | 0.00  | 0.08   | -0.04   |
| 37 | H  | 32 | 30 | 29 | 1.230  | 7.087  | -1.956 | -0.979 | 6.640  | -2.989 | 0.00  | -0.12  | 0.24    |
| 38 | H  | 34 | 31 | 29 | -2.955 | 7.994  | -1.548 | -5.193 | 6.485  | -2.131 | 0.00  | 0.02   | -0.13   |
| 39 | H  | 36 | 32 | 30 | -0.659 | 8.684  | -2.204 | -3.250 | 7.637  | -3.172 | 0.00  | -0.01  | 0.13    |
| 40 | C  | 24 | 23 | 22 | -3.082 | 1.159  | 1.827  | -3.182 | 0.447  | 2.016  | 0.00  | 0.52   | 1.35    |
| 41 | C  | 40 | 24 | 23 | -3.564 | 1.700  | 3.030  | -3.818 | 0.985  | 3.147  | 0.00  | 0.17   | 1.49    |
| 42 | C  | 40 | 24 | 23 | -3.483 | -0.137 | 1.465  | -3.152 | -0.950 | 1.866  | 0.00  | -0.12  | 0.89    |
| 43 | C  | 41 | 40 | 24 | -4.435 | 0.973  | 3.838  | -4.427 | 0.153  | 4.084  | 0.00  | 0.00   | -0.88   |
| 44 | H  | 41 | 40 | 24 | -3.250 | 2.693  | 3.339  | -3.835 | 2.061  | 3.295  | 0.00  | -0.03  | -0.57   |
| 45 | C  | 42 | 40 | 24 | -4.351 | -0.866 | 2.276  | -3.754 | -1.782 | 2.808  | 0.00  | 0.13   | 0.68    |
| 46 | H  | 42 | 40 | 24 | -3.140 | -0.565 | 0.530  | -2.691 | -1.388 | 0.987  | 0.00  | 0.11   | 0.19    |
| 47 | C  | 43 | 41 | 40 | -4.838 | -0.310 | 3.461  | -4.404 | -1.234 | 3.915  | 0.00  | -0.08  | 0.12    |
| 48 | H  | 43 | 41 | 40 | -4.801 | 1.410  | 4.763  | -4.922 | 0.589  | 4.947  | 0.00  | -0.02  | 0.28    |
| 49 | H  | 45 | 42 | 40 | -4.656 | -1.864 | 1.972  | -3.729 | -2.859 | 2.664  | 0.00  | 0.00   | -0.16   |

|    |   |    |    |    |        |        |        |        |        |        |       |        |         |
|----|---|----|----|----|--------|--------|--------|--------|--------|--------|-------|--------|---------|
| 50 | H | 47 | 43 | 41 | -5.527 | -0.872 | 4.086  | -4.890 | -1.880 | 4.640  | 0.00  | 0.09   | 358.08  |
| 51 | C | 18 | 16 | 13 | 0.516  | -0.061 | 3.627  | 0.586  | 0.557  | 3.613  | 0.00  | -0.54  | 10.64   |
| 52 | C | 51 | 18 | 16 | 0.603  | 0.837  | 4.704  | 0.339  | 1.652  | 4.459  | 0.00  | 0.15   | 1.12    |
| 53 | C | 51 | 18 | 16 | -0.543 | -0.980 | 3.594  | -0.077 | -0.656 | 3.856  | 0.00  | -0.45  | 2.59    |
| 54 | C | 52 | 51 | 18 | -0.340 | 0.808  | 5.730  | -0.546 | 1.533  | 5.529  | 0.00  | -0.12  | 1.22    |
| 55 | H | 52 | 51 | 18 | 1.413  | 1.562  | 4.734  | 0.846  | 2.595  | 4.274  | 0.00  | -0.08  | 0.99    |
| 56 | C | 53 | 51 | 18 | -1.479 | -1.013 | 4.625  | -0.955 | -0.773 | 4.934  | 0.00  | -0.09  | -1.27   |
| 57 | H | 53 | 51 | 18 | -0.613 | -1.689 | 2.777  | 0.129  | -1.518 | 3.230  | 0.00  | 0.04   | -0.45   |
| 58 | C | 56 | 53 | 51 | -1.380 | -0.123 | 5.697  | -1.188 | 0.317  | 5.773  | 0.00  | -0.06  | -0.06   |
| 59 | H | 54 | 52 | 51 | -0.259 | 1.509  | 6.556  | -0.727 | 2.387  | 6.175  | 0.00  | 0.01   | -0.01   |
| 60 | H | 56 | 53 | 51 | -2.288 | -1.736 | 4.590  | -1.452 | -1.720 | 5.120  | 0.00  | 0.14   | 0.20    |
| 61 | H | 58 | 56 | 53 | -2.109 | -0.156 | 6.502  | -1.867 | 0.220  | 6.616  | 0.00  | -0.08  | 0.10    |
| 62 | C | 17 | 16 | 13 | 5.120  | -0.100 | 1.511  | 5.036  | 1.389  | 1.355  | 0.00  | 0.50   | -2.97   |
| 63 | C | 62 | 17 | 16 | 5.707  | 0.805  | 0.611  | 5.381  | 2.158  | 0.230  | 0.00  | 0.05   | -5.19   |
| 64 | C | 62 | 17 | 16 | 5.947  | -0.973 | 2.236  | 6.041  | 1.020  | 2.266  | 0.00  | -0.24  | -5.78   |
| 65 | C | 63 | 62 | 17 | 7.090  | 0.823  | 0.429  | 6.707  | 2.535  | 0.017  | 0.00  | -0.19  | -0.60   |
| 66 | H | 63 | 62 | 17 | 5.081  | 1.516  | 0.079  | 4.606  | 2.483  | -0.457 | 0.00  | 0.08   | -0.89   |
| 67 | C | 64 | 62 | 17 | 7.330  | -0.951 | 2.053  | 7.364  | 1.398  | 2.046  | 0.00  | -0.07  | 0.41    |
| 68 | H | 64 | 62 | 17 | 5.500  | -1.672 | 2.936  | 5.780  | 0.427  | 3.137  | 0.00  | 0.15   | 0.67    |
| 69 | C | 67 | 64 | 62 | 7.904  | -0.056 | 1.147  | 7.701  | 2.153  | 0.920  | 0.00  | 0.07   | -0.31   |
| 70 | H | 65 | 63 | 62 | 7.535  | 1.534  | -0.262 | 6.961  | 3.137  | -0.851 | 0.00  | -0.14  | -0.09   |
| 71 | H | 67 | 64 | 62 | 7.958  | -1.633 | 2.618  | 8.133  | 1.101  | 2.754  | 0.00  | 0.00   | 0.21    |
| 72 | H | 69 | 67 | 64 | 8.981  | -0.039 | 1.007  | 8.733  | 2.448  | 0.752  | 0.00  | -0.01  | -359.87 |
| 73 | P | 28 | 26 | 24 | -0.904 | -2.108 | -1.229 | -0.291 | -2.302 | -1.156 | 0.12  | -17.67 | 0.55    |
| 74 | C | 73 | 28 | 26 | 0.401  | -2.980 | -2.216 | 1.148  | -2.894 | -2.130 | -0.02 | 0.47   | -101.79 |
| 75 | C | 74 | 73 | 28 | 0.857  | -4.273 | -1.925 | 1.797  | -4.109 | -1.857 | 0.00  | -1.02  | 4.33    |
| 76 | C | 74 | 73 | 28 | 0.977  | -2.286 | -3.297 | 1.595  | -2.100 | -3.203 | 0.00  | 0.38   | 1.98    |
| 77 | C | 75 | 74 | 73 | 1.867  | -4.858 | -2.695 | 2.876  | -4.519 | -2.643 | 0.00  | -0.33  | 357.62  |
| 78 | H | 75 | 74 | 73 | 0.423  | -4.834 | -1.105 | 1.461  | -4.738 | -1.040 | 0.00  | 0.14   | -2.51   |
| 79 | C | 76 | 74 | 73 | 1.978  | -2.875 | -4.068 | 2.669  | -2.520 | -3.986 | 0.00  | -0.53  | -357.84 |
| 80 | H | 76 | 74 | 73 | 0.628  | -1.288 | -3.549 | 1.107  | -1.156 | -3.425 | 0.00  | 0.39   | 3.41    |
| 81 | C | 77 | 75 | 74 | 2.430  | -4.164 | -3.766 | 3.313  | -3.728 | -3.706 | 0.00  | -0.14  | 0.05    |
| 82 | H | 77 | 75 | 74 | 2.206  | -5.863 | -2.459 | 3.369  | -5.462 | -2.425 | 0.00  | 0.07   | -0.11   |
| 83 | H | 79 | 76 | 74 | 2.403  | -2.331 | -4.907 | 3.004  | -1.899 | -4.812 | 0.00  | -0.21  | 0.73    |
| 84 | H | 81 | 77 | 75 | 3.210  | -4.623 | -4.366 | 4.151  | -4.051 | -4.316 | 0.00  | -0.16  | -0.26   |
| 85 | C | 73 | 28 | 26 | -2.239 | -1.883 | -2.484 | -1.721 | -2.455 | -2.297 | -0.01 | 0.92   | -106.89 |
| 86 | C | 85 | 73 | 28 | -2.474 | -2.838 | -3.489 | -1.695 | -3.360 | -3.372 | 0.00  | -0.65  | -6.89   |
| 87 | C | 85 | 73 | 28 | -3.048 | -0.737 | -2.434 | -2.879 | -1.690 | -2.073 | 0.00  | 0.31   | -8.57   |
| 88 | C | 86 | 85 | 73 | -3.499 | -2.649 | -4.416 | -2.809 | -3.499 | -4.200 | 0.00  | -0.23  | -1.71   |
| 89 | H | 86 | 85 | 73 | -1.853 | -3.726 | -3.550 | -0.808 | -3.955 | -3.564 | 0.00  | 0.20   | -1.44   |
| 90 | C | 87 | 85 | 73 | -4.076 | -0.553 | -3.362 | -3.991 | -1.837 | -2.904 | 0.00  | -0.24  | 1.72    |
| 91 | H | 87 | 85 | 73 | -2.874 | 0.013  | -1.667 | -2.913 | -0.979 | -1.254 | 0.00  | 0.44   | 1.92    |
| 92 | C | 90 | 87 | 85 | -4.302 | -1.507 | -4.355 | -3.958 | -2.740 | -3.968 | 0.00  | 0.06   | -0.05   |



|     |   |     |    |    |        |        |        |        |        |        |       |       |         |
|-----|---|-----|----|----|--------|--------|--------|--------|--------|--------|-------|-------|---------|
| 93  | H | 88  | 86 | 85 | -3.669 | -3.395 | -5.188 | -2.777 | -4.202 | -5.028 | 0.00  | -0.10 | 0.03    |
| 94  | H | 90  | 87 | 85 | -4.697 | 0.337  | -3.309 | -4.881 | -1.242 | -2.720 | 0.00  | -0.10 | 0.14    |
| 95  | H | 92  | 90 | 87 | -5.098 | -1.363 | -5.079 | -4.822 | -2.850 | -4.616 | 0.00  | -0.06 | 0.05    |
| 96  | C | 73  | 28 | 26 | -1.546 | -3.394 | -0.074 | -0.564 | -3.547 | 0.168  | -0.01 | -6.37 | 256.26  |
| 97  | C | 96  | 73 | 28 | -2.800 | -4.003 | -0.228 | -1.674 | -4.406 | 0.174  | 0.00  | -0.72 | -1.35   |
| 98  | C | 96  | 73 | 28 | -0.752 | -3.748 | 1.032  | 0.361  | -3.615 | 1.228  | 0.00  | 0.42  | -1.69   |
| 99  | C | 97  | 96 | 73 | -3.246 | -4.947 | 0.700  | -1.849 | -5.321 | 1.214  | 0.00  | -0.19 | -0.59   |
| 100 | H | 97  | 96 | 73 | -3.432 | -3.745 | -1.071 | -2.397 | -4.367 | -0.634 | 0.00  | -0.04 | -0.19   |
| 101 | C | 98  | 96 | 73 | -1.194 | -4.702 | 1.949  | 0.187  | -4.539 | 2.258  | 0.00  | -0.25 | 0.36    |
| 102 | H | 98  | 96 | 73 | 0.217  | -3.275 | 1.177  | 1.223  | -2.952 | 1.244  | 0.00  | 0.28  | -0.08   |
| 103 | C | 99  | 97 | 96 | -2.445 | -5.302 | 1.786  | -0.920 | -5.392 | 2.254  | 0.00  | -0.03 | 0.29    |
| 104 | H | 99  | 97 | 96 | -4.220 | -5.410 | 0.567  | -2.707 | -5.986 | 1.204  | 0.00  | 0.01  | -359.49 |
| 105 | H | 101 | 98 | 96 | -0.565 | -4.970 | 2.793  | 0.914  | -4.590 | 3.064  | 0.00  | 0.00  | -0.24   |
| 106 | H | 103 | 99 | 97 | -2.793 | -6.040 | 2.503  | -1.056 | -6.109 | 3.059  | 0.00  | -0.07 | 0.05    |

## 2.5. DFT calculation results for P5

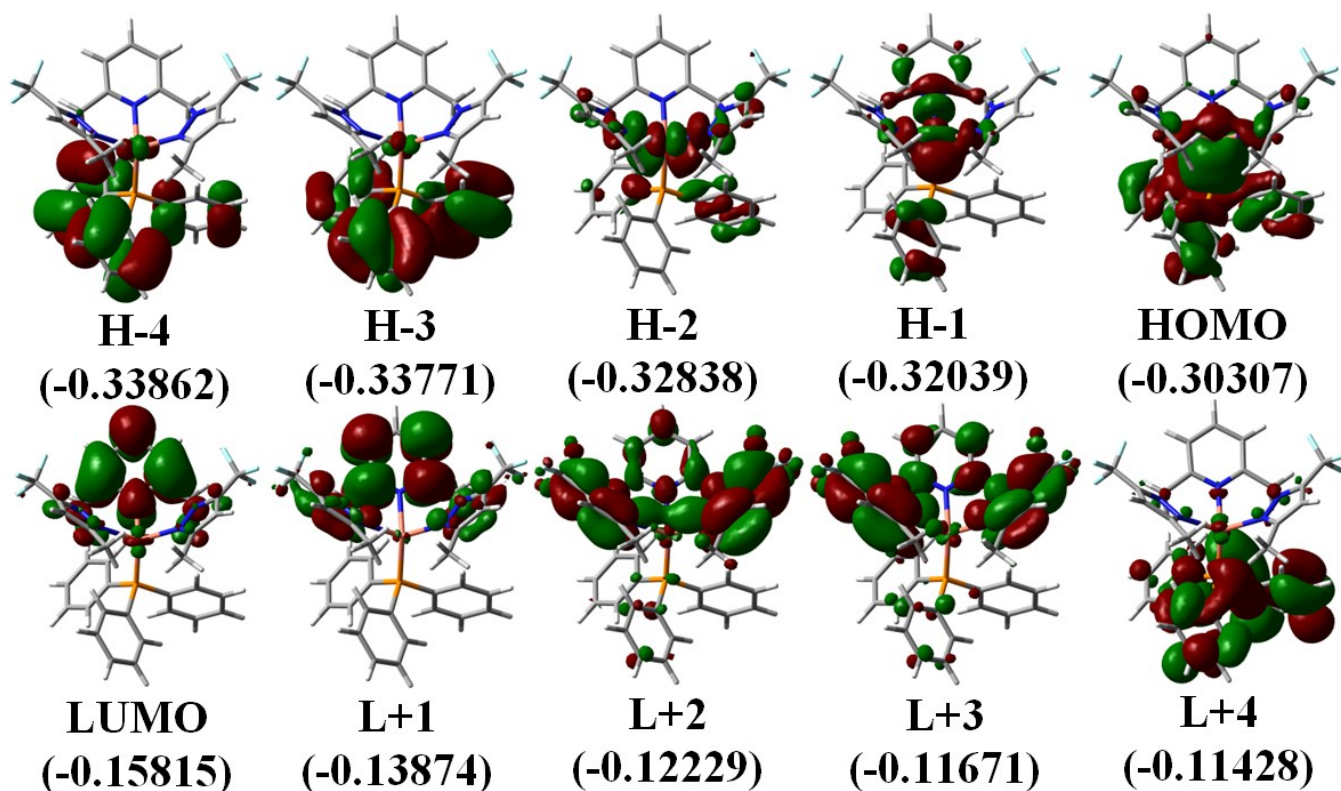

**Fig. S15** Representations of the frontier MOs for **P5**. The MO energies are in a.u.

**Table S15** Relative atomic contributions (in %) of the frontier MOs of compound **P5** separated by fragments. The grey boxes indicate the major contributions. (H = HOMO, L = LUMO)

| Molecular Fragment                         | H-4          | H-3          | H-2          | H-1          | HOMO         | LUMO         | L+1          | L+2          | L+3          | L+4          |
|--------------------------------------------|--------------|--------------|--------------|--------------|--------------|--------------|--------------|--------------|--------------|--------------|
| Pyridine                                   | 1.04         | 0.62         | 0.38         | 17.48        | 1.50         | <b>82.21</b> | <b>78.24</b> | 11.84        | 16.22        | 1.16         |
| Pyrazole groups                            | 1.43         | 0.63         | 17.94        | 7.25         | 8.54         | 12.83        | 18.57        | <b>68.03</b> | <b>65.34</b> | 2.33         |
| Copper                                     | 5.10         | 3.02         | <b>74.33</b> | <b>68.91</b> | 40.57        | 2.15         | 0.80         | 3.43         | 1.07         | 1.11         |
| Triphenylphosphine                         | <b>91.71</b> | <b>95.41</b> | 6.43         | 6.02         | <b>48.88</b> | 2.05         | 0.95         | 5.86         | 6.80         | <b>94.35</b> |
| CF <sub>3</sub> and CH <sub>3</sub> groups | 0.71         | 0.32         | 0.92         | 0.33         | 0.51         | 0.76         | 1.44         | 10.84        | 10.58        | 1.05         |

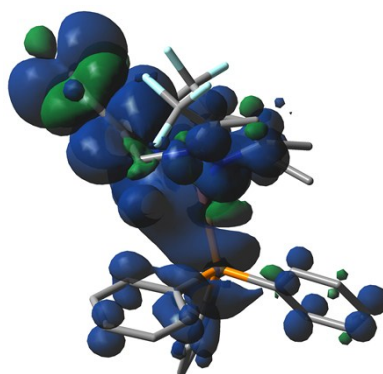

**Fig. S16** Side view image of the spin density distribution for **P5** showing the mixed MMCT and LLCT.

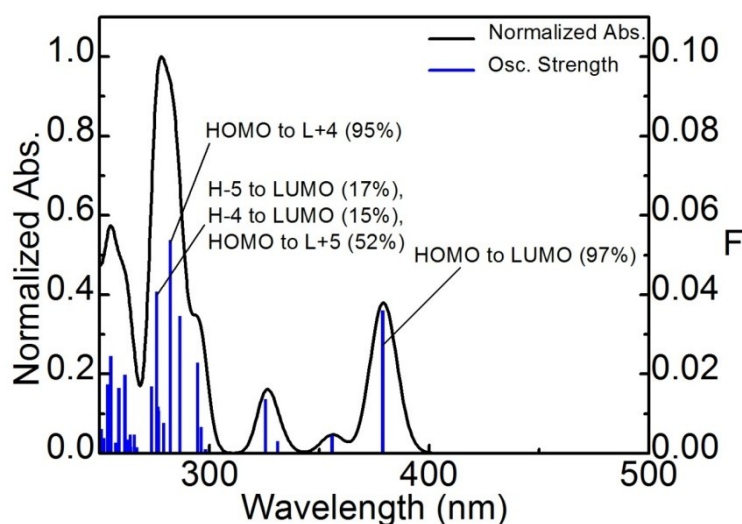

**Fig. S17** Bar graph representing the positions of the first hundred electronic transitions (blue). Calculated spectrum by applying a thickness of  $1000\text{cm}^{-1}$  to each bar (black). There is no vibronic component in these transitions. The assignments of the most intense transitions are provided.

**Table S16** Calculated positions of the 100 first electronic transitions, oscillator strength (F) and major contributors to these electronic transitions for **P5**.

| Wavelength (nm) | Osc. Strength | Major contributors (%)                          |
|-----------------|---------------|-------------------------------------------------|
| 378.7           | 0.036         | HOMO→LUMO (97%)                                 |
| 355.7           | 0.0045        | H-1→LUMO (97%)                                  |
| 331.0           | 0.0031        | H-2→LUMO (96%)                                  |
| 325.5           | 0.0137        | HOMO→L+1 (96%)                                  |
| 302.1           | 0.0001        | H-1→L+1 (97%)                                   |
| 298.1           | 0.001         | H-8→LUMO (27%), H-7→LUMO (64%)                  |
| 296.1           | 0.0066        | H-9→LUMO (15%), H-6→LUMO (13%), H-5→LUMO (13%), |

|       |        |                                                                           |
|-------|--------|---------------------------------------------------------------------------|
|       |        | HOMO→L+2 (37%)                                                            |
| 294.5 | 0.0229 | H-5→LUMO (14%), HOMO→L+2 (55%)                                            |
| 286.5 | 0.0346 | HOMO→L+3 (93%)                                                            |
| 282.0 | 0.0538 | HOMO→L+4 (95%)                                                            |
| 281.6 | 0.0002 | H-2→L+1 (84%)                                                             |
| 279.1 | 0.0077 | H-4→LUMO (29%), H-3→LUMO (41%)                                            |
| 276.7 | 0.0108 | H-4→LUMO (34%), H-3→LUMO (22%), HOMO→L+5 (30%)                            |
| 276.5 | 0.0118 | H-5→LUMO (33%), H-3→LUMO (27%), HOMO→L+5 (13%)                            |
| 275.9 | 0.0407 | H-5→LUMO (17%), H-4→LUMO (15%), HOMO→L+5 (52%)                            |
| 273.5 | 0.0169 | H-1→L+2 (87%)                                                             |
| 266.7 | 0.0015 | H-8→LUMO (30%), H-6→LUMO (50%)                                            |
| 265.8 | 0.0048 | H-1→L+3 (89%)                                                             |
| 264.1 | 0.0017 | H-9→LUMO (64%), H-8→LUMO (16%)                                            |
| 263.9 | 0.0047 | HOMO→L+6 (88%)                                                            |
| 263.0 | 0.0035 | H-10→LUMO (72%)                                                           |
| 261.4 | 0.0198 | H-2→L+2 (87%)                                                             |
| 258.7 | 0.0165 | H-11→LUMO (60%)                                                           |
| 257.3 | 0.0027 | H-11→LUMO (24%), H-9→L+1 (10%), H-7→L+1 (25%), H-5→L+1 (21%)              |
| 256.3 | 0.0001 | H-8→L+1 (34%), H-7→L+1 (35%), H-6→L+1 (11%)                               |
| 255.0 | 0.0245 | H-2→L+3 (14%), H-1→L+4 (77%)                                              |
| 253.4 | 0.0174 | H-12→LUMO (93%)                                                           |
| 251.7 | 0.0039 | H-2→L+3 (17%), H-1→L+5 (70%)                                              |
| 250.7 | 0.0061 | H-2→L+3 (45%), H-1→L+5 (23%), HOMO→L+7 (16%)                              |
| 249.0 | 0.0016 | H-4→L+1 (28%), H-3→L+1 (41%)                                              |
| 247.9 | 0.0193 | H-2→L+4 (14%), HOMO→L+7 (53%)                                             |
| 246.9 | 0.002  | H-4→L+1 (21%), H-3→L+1 (42%), H-2→L+4 (19%)                               |
| 246.8 | 0.0131 | H-5→L+1 (11%), H-2→L+4 (50%), HOMO→L+7 (11%)                              |
| 246.5 | 0.0013 | H-5→L+1 (45%), H-4→L+1 (29%)                                              |
| 244.8 | 0.0009 | HOMO→L+8 (64%)                                                            |
| 242.7 | 0.0003 | HOMO→L+9 (63%)                                                            |
| 240.5 | 0.0408 | H-2→L+5 (71%)                                                             |
| 239.6 | 0.0011 | H-1→L+6 (89%)                                                             |
| 239.1 | 0.0015 | H-8→L+2 (31%), H-7→L+2 (53%)                                              |
| 239.0 | 0.0004 | H-8→L+1 (31%), H-6→L+1 (51%)                                              |
| 237.8 | 0.0021 | H-9→L+2 (16%), H-7→L+2 (12%), H-6→L+2 (13%), H-5→L+2 (12%), H-2→L+5 (12%) |
| 236.9 | 0.0023 | H-9→L+1 (63%), H-8→L+1 (15%)                                              |
| 235.9 | 0.0038 | H-10→L+1 (74%)                                                            |
| 233.9 | 0.0011 | H-13→LUMO (75%)                                                           |
| 233.5 | 0.0013 | H-13→LUMO (17%), H-9→L+3 (11%), H-7→L+3 (22%), H-5→L+3 (13%)              |
| 232.6 | 0.0084 | H-4→L+5 (10%), H-3→L+4 (26%)                                              |
| 231.5 | 0.0114 | H-3→L+2 (13%)                                                             |
| 231.0 | 0.0096 | H-11→L+1 (51%), H-2→L+6 (17%)                                             |

|       |        |                                                                           |
|-------|--------|---------------------------------------------------------------------------|
| 230.8 | 0.007  | H-11→L+1 (12%), H-2→L+6 (59%)                                             |
| 230.7 | 0.0126 | H-11→L+1 (13%), H-8→L+3 (22%), H-7→L+3 (25%)                              |
| 229.7 | 0.0016 | H-3→L+2 (59%)                                                             |
| 229.0 | 0.0102 | H-15→LUMO (22%), H-12→L+1 (45%)                                           |
| 228.9 | 0.0113 | H-14→LUMO (42%), H-5→L+2 (17%)                                            |
| 228.3 | 0.0114 | H-12→L+1 (27%), H-4→L+5 (15%)                                             |
| 228.0 | 0.0159 | H-14→LUMO (31%), H-4→L+2 (22%)                                            |
| 227.5 | 0.0363 | H-15→LUMO (22%), H-14→LUMO (15%), H-12→L+1 (16%)                          |
| 226.8 | 0.0092 | H-8→L+4 (12%), H-4→L+2 (25%)                                              |
| 226.6 | 0.0168 | H-8→L+4 (14%), H-7→L+4 (26%), H-5→L+2 (12%)                               |
| 225.9 | 0.0011 | H-7→L+4 (11%), H-5→L+2 (11%), H-5→L+4 (11%), H-4→L+4 (11%), H-1→L+7 (15%) |
| 225.4 | 0.001  | H-4→L+4 (24%), H-3→L+5 (10%), H-1→L+7 (39%)                               |
| 224.7 | 0.0018 | H-3→L+3 (12%), H-3→L+5 (21%), H-1→L+7 (25%)                               |
| 223.8 | 0.0174 | H-5→L+4 (12%), H-5→L+5 (19%)                                              |
| 223.2 | 0.0109 | H-5→L+3 (13%), H-5→L+5 (33%), H-3→L+5 (12%)                               |
| 222.9 | 0.0033 | H-3→L+3 (16%)                                                             |
| 222.3 | 0.0091 | H-8→L+2 (11%), H-5→L+3 (20%)                                              |
| 222.2 | 0.0093 | H-6→L+5 (25%), H-4→L+3 (13%), H-3→L+5 (11%)                               |
| 221.8 | 0.0006 | H-8→L+5 (11%), H-7→L+5 (20%), H-4→L+3 (20%), H-3→L+3 (16%)                |
| 221.3 | 0.0038 | H-8→L+5 (11%), H-7→L+5 (27%), H-3→L+3 (21%)                               |
| 220.7 | 0.0055 | H-8→L+4 (17%), H-8→L+5 (14%), H-4→L+3 (13%)                               |
| 220.3 | 0.0015 | H-9→L+2 (22%), H-7→L+5 (11%), H-6→L+2 (17%), H-4→L+3 (13%)                |
| 219.4 | 0.0082 | H-9→L+5 (24%), H-1→L+8 (11%)                                              |
| 219.1 | 0.0043 | H-9→L+2 (11%), H-8→L+2 (20%), H-5→L+3 (10%), H-3→L+3 (11%)                |
| 218.7 | 0.0002 | H-6→L+2 (20%), H-6→L+4 (18%)                                              |
| 217.8 | 0.004  | H-9→L+4 (11%), H-2→L+7 (11%), H-1→L+8 (36%)                               |
| 217.6 | 0.0065 | H-10→L+2 (25%), H-10→L+4 (10%), H-2→L+7 (23%), H-1→L+8 (19%)              |
| 217.3 | 0.0051 | H-1→L+9 (76%)                                                             |
| 217.0 | 0.0016 | H-10→L+2 (22%), H-2→L+7 (45%)                                             |
| 215.9 | 0.0142 | H-9→L+5 (18%), H-8→L+5 (10%), H-4→L+6 (11%)                               |
| 215.6 | 0.0102 | H-10→L+4 (14%), H-6→L+3 (10%), H-3→L+6 (15%), HOMO→L+11 (10%)             |
| 214.6 | 0.0181 | H-8→L+3 (11%), H-6→L+3 (10%), HOMO→L+10 (12%), HOMO→L+11 (15%)            |
| 214.4 | 0.0059 | H-10→L+2 (12%), H-8→L+3 (11%), H-6→L+3 (29%)                              |
| 213.6 | 0.0067 | H-9→L+6 (14%), H-7→L+6 (15%), H-5→L+6 (25%), H-4→L+6 (10%)                |
| 213.5 | 0.0055 | H-9→L+3 (42%), H-6→L+3 (10%)                                              |
| 213.1 | 0.0115 | H-7→L+6 (18%), H-2→L+8 (23%)                                              |
| 212.7 | 0.0119 | H-8→L+6 (10%), H-7→L+6 (19%), H-2→L+8 (33%), H-2→L+9 (13%)                |
| 212.4 | 0.0501 | H-8→L+6 (12%), H-6→L+5 (10%), H-3→L+6 (12%)                               |
| 211.6 | 0.0045 | H-13→L+1 (59%), H-11→L+2 (10%), H-10→L+3 (16%)                            |
| 211.5 | 0.0318 | H-10→L+3 (10%), H-10→L+4 (10%)                                            |

|       |        |                                                               |
|-------|--------|---------------------------------------------------------------|
| 211.3 | 0.034  | H-10→L+3 (22%), H-4→L+6 (10%)                                 |
| 210.7 | 0.0306 | H-11→L+2 (12%), H-10→L+3 (17%), H-10→L+5 (20%), H-8→L+6 (12%) |
| 210.3 | 0.0048 | H-13→L+1 (15%), H-11→L+2 (48%)                                |
| 209.8 | 0.019  | H-2→L+8 (13%), H-2→L+9 (32%)                                  |
| 208.9 | 0.0436 | H-12→L+2 (25%), HOMO→L+10 (15%), HOMO→L+11 (18%)              |
| 208.3 | 0.0169 | H-6→L+6 (19%), H-5→L+6 (13%), H-5→L+7 (11%), H-2→L+9 (18%)    |
| 207.6 | 0.0086 | H-9→L+6 (11%), H-6→L+6 (18%), H-3→L+7 (12%)                   |
| 206.9 | 0.0001 | H-14→L+1 (84%)                                                |
| 206.8 | 0.0033 | H-20→LUMO (17%), H-16→LUMO (32%)                              |
| 206.5 | 0.0099 | H-10→L+5 (10%), H-5→L+6 (12%)                                 |
| 205.9 | 0.0121 | H-12→L+2 (10%), H-11→L+3 (31%), HOMO→L+12 (21%)               |
| 205.2 | 0.047  | H-12→L+2 (36%), HOMO→L+10 (19%), HOMO→L+11 (15%)              |

**Table S17** Geometric parameters about the Cu atom for compound **P5** in the S<sub>0</sub> and T<sub>1</sub> states.

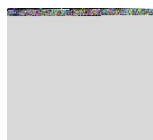

| Geometric Parameter |                                   | Singlet State | Triplet State | Difference |
|---------------------|-----------------------------------|---------------|---------------|------------|
| Bond Length<br>(Å)  | P-Cu                              | 2.2886        | 2.436         | 0.1474     |
|                     | N <sub>1</sub> -Cu                | 2.2048        | 2.0809        | 0.1239     |
|                     | N <sub>2</sub> -Cu                | 2.2094        | 1.9598        | 0.2496     |
|                     | N <sub>3</sub> -Cu                | 2.1758        | 2.0761        | 0.0997     |
| Bond Angle<br>(°)   | P-Cu-N <sub>1</sub>               | 116.4014      | 101.2761      | 15.1253    |
|                     | P-Cu-N <sub>2</sub>               | 122.8421      | 138.8836      | 16.0415    |
|                     | P-Cu-N <sub>3</sub>               | 117.2576      | 104.8318      | 12.4258    |
|                     | N <sub>1</sub> -Cu-N <sub>2</sub> | 88.3602       | 92.0548       | 3.6946     |
|                     | N <sub>2</sub> -Cu-N <sub>3</sub> | 90.9027       | 95.7959       | 4.8932     |
|                     | N <sub>3</sub> -Cu-N <sub>1</sub> | 115.5492      | 129.1627      | 13.6135    |

**Table S18** Conformational analysis comparing the optimized structures of the singlet and triplet states of **P5**.

| Atom ID |        |    |    |    | Singlet State |        |        | Triplet State |        |        | Conformation Change |         |            |
|---------|--------|----|----|----|---------------|--------|--------|---------------|--------|--------|---------------------|---------|------------|
| Tag     | Symbol | NA | NB | NC | X             | Y      | Z      | X             | Y      | Z      | Δ Bond              | Δ Angle | Δ Dihedral |
| 1       | C      |    |    |    | 0.242         | -2.437 | -1.609 | 0.741         | -2.636 | -1.412 |                     |         |            |
| 2       | C      | 1  |    |    | -0.139        | -3.591 | -2.296 | 0.634         | -3.872 | -2.008 | -0.02               |         |            |
| 3       | C      | 2  | 1  |    | -1.477        | -3.748 | -2.656 | -0.627        | -4.428 | -2.300 | 0.02                | 2.09    |            |
| 4       | C      | 3  | 2  | 1  | -2.388        | -2.747 | -2.319 | -1.759        | -3.635 | -2.012 | 0.02                | -1.95   | 2.87       |

|    |    |    |    |    |        |        |        |        |        |        |       |        |         |
|----|----|----|----|----|--------|--------|--------|--------|--------|--------|-------|--------|---------|
| 5  | C  | 4  | 3  | 2  | -1.927 | -1.621 | -1.637 | -1.624 | -2.403 | -1.415 | -0.02 | 2.09   | -3.17   |
| 6  | N  | 5  | 4  | 3  | -0.638 | -1.473 | -1.283 | -0.381 | -1.884 | -1.040 | 0.05  | 0.12   | -0.75   |
| 7  | H  | 3  | 2  | 1  | -1.804 | -4.636 | -3.187 | -0.724 | -5.402 | -2.763 | 0.00  | 0.98   | 0.15    |
| 8  | H  | 2  | 1  | 6  | 0.598  | -4.351 | -2.530 | 1.545  | -4.409 | -2.262 | 0.00  | -1.40  | -0.02   |
| 9  | H  | 4  | 3  | 2  | -3.439 | -2.836 | -2.573 | -2.754 | -3.980 | -2.279 | 0.00  | -0.81  | 355.08  |
| 10 | C  | 1  | 6  | 5  | 1.667  | -2.198 | -1.164 | 2.071  | -1.992 | -1.180 | -0.02 | 5.98   | 3.70    |
| 11 | H  | 10 | 1  | 6  | 1.964  | -1.171 | -1.396 | 2.122  | -0.996 | -1.639 | 0.00  | 1.57   | 169.91  |
| 12 | H  | 10 | 1  | 6  | 2.357  | -2.874 | -1.665 | 2.881  | -2.595 | -1.586 | 0.00  | 0.10   | 168.87  |
| 13 | C  | 5  | 4  | 3  | -2.846 | -0.483 | -1.257 | -2.793 | -1.483 | -1.279 | -0.02 | -1.05  | -7.45   |
| 14 | H  | 13 | 5  | 4  | -3.809 | -0.573 | -1.758 | -3.705 | -1.960 | -1.631 | 0.00  | -0.17  | 16.33   |
| 15 | H  | 13 | 5  | 4  | -2.397 | 0.471  | -1.551 | -2.639 | -0.565 | -1.867 | 0.01  | 1.01   | 15.86   |
| 16 | N  | 13 | 5  | 4  | -3.101 | -0.417 | 0.183  | -3.045 | -1.031 | 0.102  | 0.01  | 1.27   | 16.41   |
| 17 | C  | 16 | 13 | 5  | -4.272 | -0.607 | 0.848  | -4.135 | -1.210 | 0.885  | -0.01 | 1.08   | -4.46   |
| 18 | C  | 16 | 13 | 5  | -2.702 | 0.100  | 2.244  | -2.686 | 0.119  | 1.914  | 0.01  | -0.41  | -8.29   |
| 19 | C  | 17 | 16 | 13 | -4.057 | -0.288 | 2.172  | -3.943 | -0.492 | 2.052  | 0.00  | 0.34   | -1.45   |
| 20 | H  | 19 | 17 | 16 | -4.781 | -0.322 | 2.972  | -4.624 | -0.419 | 2.886  | 0.00  | -0.01  | 0.14    |
| 21 | N  | 10 | 1  | 6  | 1.819  | -2.395 | 0.278  | 2.342  | -1.803 | 0.257  | 0.01  | 0.18   | -190.78 |
| 22 | C  | 21 | 10 | 1  | 2.475  | -3.388 | 0.934  | 3.175  | -2.489 | 1.075  | -0.01 | 0.91   | -5.19   |
| 23 | C  | 22 | 21 | 10 | 2.333  | -3.154 | 2.286  | 2.892  | -2.116 | 2.377  | 0.00  | 0.32   | 11.12   |
| 24 | C  | 23 | 22 | 21 | 1.554  | -1.982 | 2.380  | 1.837  | -1.196 | 2.285  | -0.01 | 0.38   | 0.53    |
| 25 | H  | 23 | 22 | 21 | 2.742  | -3.743 | 3.093  | 3.382  | -2.465 | 3.273  | 0.00  | -0.02  | 0.01    |
| 26 | N  | 24 | 23 | 22 | 1.241  | -1.533 | 1.152  | 1.516  | -1.007 | 0.983  | 0.01  | -0.79  | -1.03   |
| 27 | N  | 18 | 16 | 13 | -2.129 | 0.004  | 1.032  | -2.147 | -0.225 | 0.722  | 0.01  | -0.43  | 3.70    |
| 28 | Cu | 27 | 18 | 16 | -0.089 | -0.007 | 0.277  | -0.185 | -0.263 | 0.044  | -0.22 | -12.56 | -4.63   |
| 29 | C  | 22 | 21 | 10 | 3.200  | -4.491 | 0.232  | 4.193  | -3.465 | 0.568  | 0.00  | -0.14  | 10.63   |
| 30 | C  | 24 | 23 | 22 | 1.102  | -1.292 | 3.628  | 1.109  | -0.537 | 3.413  | 0.00  | 0.00   | -2.99   |
| 31 | H  | 30 | 24 | 23 | 1.050  | -0.210 | 3.486  | 1.090  | 0.551  | 3.309  | 0.00  | 0.81   | -19.69  |
| 32 | H  | 30 | 24 | 23 | 0.113  | -1.646 | 3.939  | 0.076  | -0.897 | 3.474  | 0.00  | -0.26  | -19.19  |
| 33 | H  | 30 | 24 | 23 | 1.797  | -1.499 | 4.447  | 1.600  | -0.777 | 4.360  | 0.00  | -0.46  | -19.41  |
| 34 | C  | 18 | 16 | 13 | -1.956 | 0.604  | 3.439  | -2.023 | 1.056  | 2.874  | 0.00  | 0.68   | 3.22    |
| 35 | H  | 34 | 18 | 16 | -2.531 | 1.387  | 3.943  | -2.657 | 1.933  | 3.046  | 0.00  | -0.09  | -10.08  |
| 36 | H  | 34 | 18 | 16 | -1.781 | -0.193 | 4.170  | -1.861 | 0.580  | 3.847  | 0.00  | -0.35  | -10.50  |
| 37 | H  | 34 | 18 | 16 | -0.991 | 1.023  | 3.145  | -1.060 | 1.407  | 2.499  | 0.00  | 1.04   | -10.26  |
| 38 | C  | 17 | 16 | 13 | -5.524 | -1.076 | 0.175  | -5.314 | -2.038 | 0.472  | 0.00  | 0.14   | -2.17   |
| 39 | F  | 29 | 22 | 21 | 3.729  | -5.342 | 1.116  | 4.920  | -3.942 | 1.586  | 0.00  | -0.41  | 355.55  |
| 40 | F  | 29 | 22 | 21 | 2.365  | -5.187 | -0.583 | 3.607  | -4.506 | -0.063 | -0.01 | 0.23   | -4.44   |
| 41 | F  | 29 | 22 | 21 | 4.193  | -4.015 | -0.553 | 5.029  | -2.886 | -0.322 | 0.00  | -0.29  | -3.97   |
| 42 | F  | 38 | 17 | 16 | -5.316 | -2.241 | -0.486 | -4.950 | -3.304 | 0.187  | -0.01 | 0.26   | 2.62    |
| 43 | F  | 38 | 17 | 16 | -6.496 | -1.265 | 1.072  | -6.223 | -2.064 | 1.454  | 0.00  | -0.52  | 2.68    |
| 44 | F  | 38 | 17 | 16 | -5.959 | -0.184 | -0.745 | -5.900 | -1.535 | -0.638 | 0.00  | -0.40  | 2.01    |
| 45 | P  | 28 | 27 | 18 | 0.863  | 2.018  | -0.203 | 0.419  | 2.079  | -0.250 | 0.15  | 21.63  | -16.25  |
| 46 | C  | 45 | 28 | 27 | -0.300 | 3.300  | -0.835 | -0.893 | 3.133  | -0.984 | -0.01 | -0.14  | 110.24  |
| 47 | C  | 46 | 45 | 28 | 0.083  | 4.257  | -1.789 | -0.565 | 4.142  | -1.906 | 0.00  | -1.85  | 3.98    |

|    |   |    |    |    |        |       |        |        |       |        |       |       |         |
|----|---|----|----|----|--------|-------|--------|--------|-------|--------|-------|-------|---------|
| 48 | C | 46 | 45 | 28 | -1.611 | 3.328 | -0.330 | -2.234 | 2.965 | -0.601 | 0.00  | 1.66  | 5.03    |
| 49 | C | 47 | 46 | 45 | -0.829 | 5.219 | -2.227 | -1.561 | 4.967 | -2.429 | 0.00  | -0.11 | 1.23    |
| 50 | H | 47 | 46 | 45 | 1.090  | 4.249 | -2.194 | 0.465  | 4.285 | -2.218 | 0.00  | 0.14  | 1.07    |
| 51 | C | 48 | 46 | 45 | -2.517 | 4.297 | -0.764 | -3.226 | 3.794 | -1.126 | 0.00  | -0.15 | -0.96   |
| 52 | H | 48 | 46 | 45 | -1.921 | 2.591 | 0.406  | -2.504 | 2.185 | 0.101  | 0.00  | 0.36  | -1.46   |
| 53 | C | 49 | 47 | 46 | -2.128 | 5.242 | -1.716 | -2.892 | 4.794 | -2.041 | 0.00  | -0.15 | 0.05    |
| 54 | H | 49 | 47 | 46 | -0.522 | 5.952 | -2.967 | -1.296 | 5.743 | -3.140 | 0.00  | -0.03 | 359.83  |
| 55 | H | 51 | 48 | 46 | -3.527 | 4.311 | -0.363 | -4.260 | 3.655 | -0.824 | 0.00  | -0.10 | 359.62  |
| 56 | H | 53 | 49 | 47 | -2.835 | 5.993 | -2.058 | -3.665 | 5.436 | -2.453 | 0.00  | -0.02 | -0.29   |
| 57 | C | 45 | 28 | 27 | 1.693  | 2.799 | 1.245  | 1.097  | 3.020 | 1.171  | -0.01 | 6.01  | -242.66 |
| 58 | C | 57 | 45 | 28 | 1.515  | 4.147 | 1.587  | 0.496  | 4.208 | 1.618  | 0.00  | -1.33 | 9.88    |
| 59 | C | 57 | 45 | 28 | 2.530  | 1.997 | 2.041  | 2.225  | 2.524 | 1.852  | 0.00  | 1.24  | 8.72    |
| 60 | C | 58 | 57 | 45 | 2.164  | 4.682 | 2.703  | 1.020  | 4.889 | 2.720  | 0.00  | -0.06 | -0.84   |
| 61 | H | 58 | 57 | 45 | 0.872  | 4.783 | 0.987  | -0.372 | 4.610 | 1.106  | 0.00  | 0.12  | -1.44   |
| 62 | C | 59 | 57 | 45 | 3.186  | 2.537 | 3.147  | 2.748  | 3.215 | 2.945  | 0.00  | -0.16 | -359.11 |
| 63 | H | 59 | 57 | 45 | 2.677  | 0.951 | 1.786  | 2.705  | 1.608 | 1.521  | 0.00  | 0.41  | 1.19    |
| 64 | C | 60 | 58 | 57 | 3.000  | 3.881 | 3.483  | 2.145  | 4.398 | 3.382  | 0.00  | 0.04  | -0.15   |
| 65 | H | 60 | 58 | 57 | 2.017  | 5.727 | 2.959  | 0.548  | 5.809 | 3.053  | 0.00  | -0.07 | 359.60  |
| 66 | H | 62 | 59 | 57 | 3.839  | 1.910 | 3.747  | 3.628  | 2.830 | 3.453  | 0.00  | -0.15 | 0.21    |
| 67 | H | 64 | 60 | 58 | 3.506  | 4.301 | 4.347  | 2.553  | 4.933 | 4.235  | 0.00  | 0.02  | -0.18   |
| 68 | C | 45 | 28 | 27 | 2.171  | 1.935 | -1.503 | 1.733  | 2.043 | -1.536 | -0.01 | -9.71 | 116.66  |
| 69 | C | 68 | 45 | 28 | 3.437  | 2.519 | -1.352 | 2.968  | 2.692 | -1.397 | 0.00  | 0.41  | 1.08    |
| 70 | C | 68 | 45 | 28 | 1.874  | 1.257 | -2.699 | 1.454  | 1.345 | -2.727 | 0.00  | -0.68 | 2.23    |
| 71 | C | 69 | 68 | 45 | 4.385  | 2.424 | -2.374 | 3.909  | 2.639 | -2.429 | 0.00  | -0.19 | 1.05    |
| 72 | H | 69 | 68 | 45 | 3.687  | 3.050 | -0.439 | 3.199  | 3.248 | -0.495 | 0.00  | 0.28  | 0.48    |
| 73 | C | 70 | 68 | 45 | 2.818  | 1.173 | -3.722 | 2.394  | 1.302 | -3.757 | 0.00  | -0.20 | -0.83   |
| 74 | H | 70 | 68 | 45 | 0.893  | 0.806 | -2.836 | 0.496  | 0.848 | -2.860 | 0.00  | 0.42  | -0.72   |
| 75 | C | 71 | 69 | 68 | 4.079  | 1.753 | -3.559 | 3.626  | 1.946 | -3.607 | 0.00  | 0.02  | -0.13   |
| 76 | H | 71 | 69 | 68 | 5.362  | 2.880 | -2.243 | 4.861  | 3.149 | -2.312 | 0.00  | -0.05 | 359.71  |
| 77 | H | 73 | 70 | 68 | 2.571  | 0.655 | -4.645 | 2.164  | 0.769 | -4.674 | 0.00  | -0.12 | -0.13   |
| 78 | H | 75 | 71 | 69 | 4.817  | 1.684 | -4.353 | 4.359  | 1.911 | -4.408 | 0.00  | -0.06 | -0.01   |



---

### 3. References

- (1) Demas, J. N.; Crosby, G. A. *J. Phys. Chem.* **1971**, *75*, 991.
- (2) Nakamaru, K. *Bull. Chem. Soc. Jpn.* **1982**, *55*, 2697.
- (3) Becke, A. D. *J. Chem. Phys.* **1993**, *98*, 5648.
- (4) Bauernschmitt, R.; Ahlrichs, R. *Chem. Phys. Lett.* **1996**, *256*, 454.
- (5) Binkley, J. S.; Pople, J. A.; Hehre, W. J. *J. Am. Chem. Soc.* **1980**, *102*, 939.
- (6) Casida, M. E.; Jamorski, C.; Casida, K. C.; Salahub, D. R. *J. Chem. Phys.* **1998**, *108*, 4439.
- (7) Gordon, M. S.; Binkley, J. S.; Pople, J. A.; Pietro, W. J.; Hehre, W. J. *J. Am. Chem. Soc.* **1982**, *104*, 2797.
- (8) Hohenberg, P.; Kohn, W. *Phys. Rev.* **1964**, *136*, B864.
- (9) Kohn, W.; Sham, L. J. *Phys. Rev.* **1965**, *140*, A1133.
- (10) Lee, C.; Yang, W.; Parr, R. G. *Phys. Rev. B* **1988**, *37*, 785.
- (11) Miehlich, B.; Savin, A.; Stoll, H.; Preuss, H. *Chem. Phys. Lett.* **1989**, *157*, 200.
- (12) Frisch, M. J.; Pople, J. A. et al. ... Gaussian 03, Revision C.02, Gaussian, Inc. Wallingford, CT, 2004
- (13) O'Boyle, N. M.; Tenderholt, A. L.; Langner, K. M. *J. Comput. Chem.* **2008**, *29*, 839.
- (14) Parr, R. G.; Yang, W. *Density-functional theory of atoms and molecules* **1989**.
- (15) Hehre, W. J.; Defrees, D. J.; Pople, J. A.; Binkley, J. S. *J. Am. Chem. Soc.* **1982**, *104*, 5039.
- (16) Salahub, D. R.; Zerner, M. C. *The Challenge of d and f Electrons*, ACS, Washington, D.C. **1989**.
- (17) Stratmann, R. E.; Scuseria, G. E.; Frisch, M. J. *J. Chem. Phys.* **1998**, *109*, 8218.
- (18) Dobbs, K. D.; Hehre, W. J. *J. Comput. Chem.* **1987**, *8*, 861.
- (19) Dobbs, K. D.; Hehre, W. J. *J. Comput. Chem.* **1986**, *7*, 359.
- (20) Vecchi, P. A.; Padmaperuma, A. B.; Qiao, H.; Sapochak, L. S.; Burrows, P. *E. Org. Lett.* **2006**, *8*, 4211.
- (21) Fawcett, J.; Platt, A. W. G.; Vickers, S.; Ward, M. D. *Polyhedron* **2004**, *23*, 2561.
